# Supplementary material for: The solvent effect on the photodeprotection of anthraquinone protected carboxylic acid unravelled by time-resolved spectroscopic studies
Source: Royal Society of Chemistry journal article supplement (doi:10.1039/c9cp01227c), 2019-01-01
Supplement: c9cp01227c1.pdf [file c9cp01227c1.pdf]

## Electronic Supplementary Information

### Solvent Effect on Photodeprotection of Anthraquinone Protected Carboxylic Acid Unravalled by Time-Resolved Spectroscopic Studies

Yan Guo,<sup>a</sup> Qingqing Song,<sup>a</sup> Tongyu Xu,<sup>a</sup> Jiani Ma,<sup>\*a</sup> and David Lee Phillips<sup>b</sup>

<sup>a</sup>Key Laboratory of Synthetic and Natural Functional Molecule Chemistry of Ministry of Education, College of Chemistry and Materials Science, Northwest University, Xi'an, P. R. China

<sup>b</sup>Department of Chemistry, The University of Hong Kong, Pokfulam Road, Hong Kong S.A.R., P. R. China

#### Table of Contents

| Graphi                                                                                                                                                                                                                                                                 | Page      |
|------------------------------------------------------------------------------------------------------------------------------------------------------------------------------------------------------------------------------------------------------------------------|-----------|
| <b>Scheme S1.</b> The synthetic route of the compound <b>1</b> .                                                                                                                                                                                                       | <b>S3</b> |
| <b>Figure S1.</b> The <sup>1</sup> H NMR spectra of <b>1</b> in CDCl <sub>3</sub> .                                                                                                                                                                                    | <b>S3</b> |
| <b>Figure S2.</b> Comparison of (a) ns-TA spectrum of <b>1</b> in ACN recorded at 400 ns to the (b) calculated triplet state species of <b>1</b> (the scale factor is 1.03 and the half-width is 800 cm <sup>-1</sup> ).                                               | <b>S4</b> |
| <b>Figure S3.</b> Ns-TA spectra of <b>1</b> in IPA recorded at later delay times.                                                                                                                                                                                      | <b>S4</b> |
| <b>Figure S4.</b> (Left) Ns-TR <sup>3</sup> spectra of <b>1</b> in IPA. (Right) Comparison of (a) the 100 ns experimental Raman spectrum to (b) the calculated ketyl radical species of <b>1</b> (the scale factor is 0.968 and the half-width is 8cm <sup>-1</sup> ). | <b>S4</b> |
| <b>Figure S5.</b> Comparison (a) ns-TA spectrum in MeOH recorded at 14 μs after photolysis of <b>1</b> with the (b) xylene form of 2-ethyl-AQ (the scale factor is 0.93 and the half-width is 2000 cm <sup>-1</sup> ).                                                 | <b>S5</b> |
| <b>Figure S6.</b> Reaction energy profiles found from (U)B3LYP/6-311G** computations for the intermolecular HAT processes that can occur after photolysis of <b>1</b> in MeOH and IPA via a triplet state surface are shown (the energy unit is kJ/mol).               | <b>S5</b> |
| <b>Figure S7.</b> Ns-TA results of <b>1</b> in (a-b) MeOH-ACN (v:v, 1:9), (c-d) MeOH-ACN (v:v, 1:1) and (e-f) MeOH-ACN (v:v, 9:1) under the irradiation of 355 nm.                                                                                                     | <b>S6</b> |
| <b>Figure S8.</b> Recordings at 250 nm of HPLC analysis of the (a) <i>p</i> -methoxybenzoic acid,(b) 2-ethyl-AQ, (c) compound <b>1</b> and (d) photoproduct of <b>1</b> in THF-H <sub>2</sub> O upon 350 nm.                                                           | <b>S7</b> |
| <b>Figure S9.</b> (Left) Ns-TR <sup>3</sup> spectra of <b>1</b> in THF-H <sub>2</sub> O (v:v, 1:1). (Right) Comparison of the ns-TR <sup>3</sup> spectrum of <b>1</b> (a) in IPA at 100 ns with that (b) in THF-H <sub>2</sub> O (v:v, 1:1).                           | <b>S7</b> |
| <b>Figure S10.</b> (a) Ns-TA results of <b>1</b> in THF-H <sub>2</sub> O (1:3) and (b) in THF-H <sub>2</sub> O (4:1) obtained at various time delays upon the irradiation of 355 nm.                                                                                   | <b>S8</b> |
| <b>Figure S11.</b> Reaction energy profile obtained from (U)B3LYP/6-311G** calculations for the photodeprotection reaction of <b>1</b> via ground state surface by assistance of two water molecules is shown (the energy unit is kJ/mol).                             | <b>S8</b> |
| <b>Figure S12.</b> Recordings at 250 nm of HPLC analysis of the (a) <i>p</i> -methoxybenzoic acid,(b) 2-ethyl-AQ, (c) compound <b>1</b> and (d) photoproduct of <b>1</b> in MeOH-H <sub>2</sub> O upon 350 nm.                                                         | <b>S9</b> |
| <b>Figure S13.</b> Ns-TA spectra of <b>1</b> in MeOH-H <sub>2</sub> O (v:v, 1:1) under the irradiation of 355 nm.                                                                                                                                                      | <b>S9</b> |

- Figure S14.** Ns-TA results of **1** in DMSO under the irradiation of 355 nm. **S9**
- Figure S15.** Fs-TA (a-b) and ns-TA (c-d) spectra of **1** in TFE under irradiation of 355 nm. **S10**
- Figure S16.** Comparison of the (a) ns-TA spectra of **1** recorded at 2  $\mu\text{s}$  with (b) computed UV-vis spectrum of AQH<sup>+</sup> (the scale factor is 1.0 and the half-width is 1500  $\text{cm}^{-1}$ ). **S10**
- Cartesian coordinates, total energies, and vibrational zero-point energies for the optimized geometry for the compounds and intermediates considered in this paper are given. **S11-S57**

**Scheme S1.** Synthetic route of compound **1**.

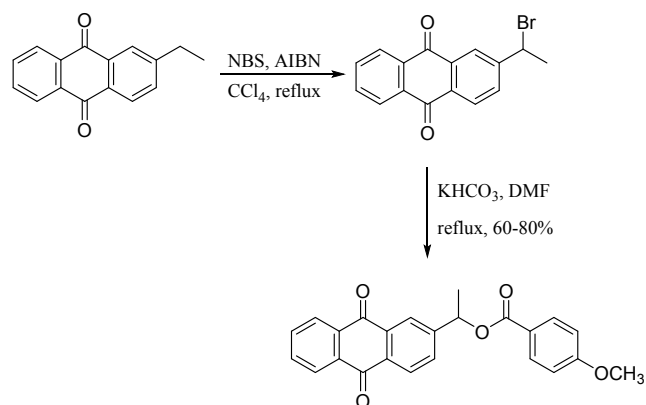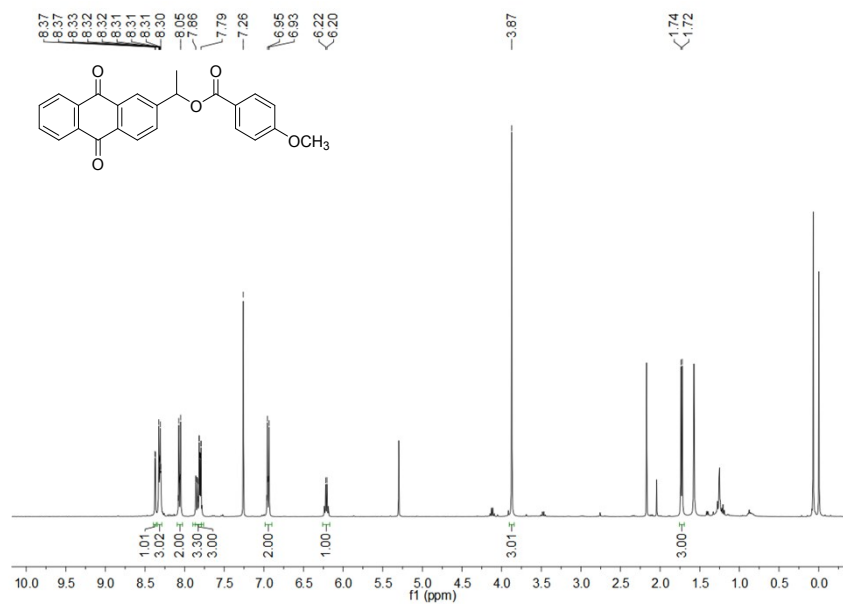

<sup>1</sup>H NMR (CDCl<sub>3</sub>) δ/ppm = 1.73 (d, 3H, CHCH<sub>3</sub>), 3.87 (s, 3H, OCH<sub>3</sub>), 6.21 (q, 1H, CHCH<sub>3</sub>), 6.94–8.30 (m, 11H, H<sub>Ar</sub>)

**Figure S1.** The <sup>1</sup>H NMR spectra of **1** in CDCl<sub>3</sub>.

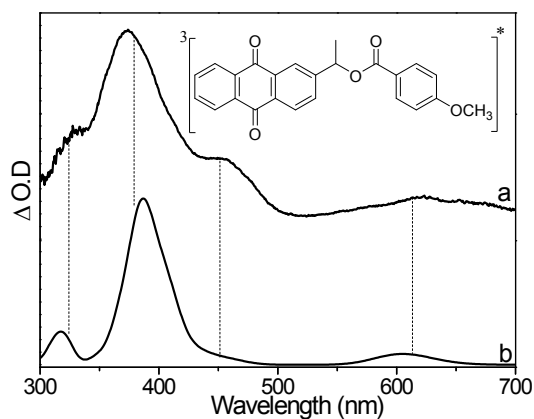

**Figure S2.** Comparison of (a) the ns-TA spectrum of **1** in ACN recorded at 400 ns to the (b) calculated triplet state species of **1** (the scale factor is 1.03 and the half-width is  $800\text{ cm}^{-1}$ ).

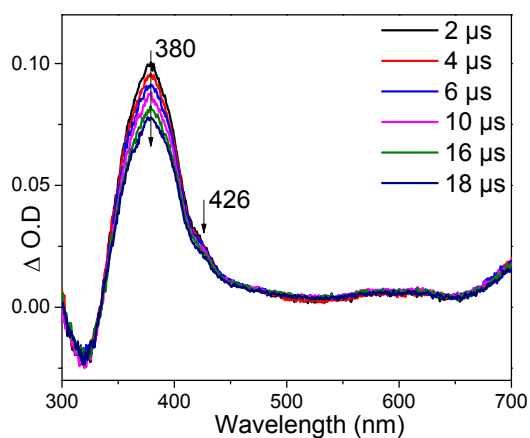

**Figure S3.** ns-TA spectra of **1** in IPA recorded at later delay times.

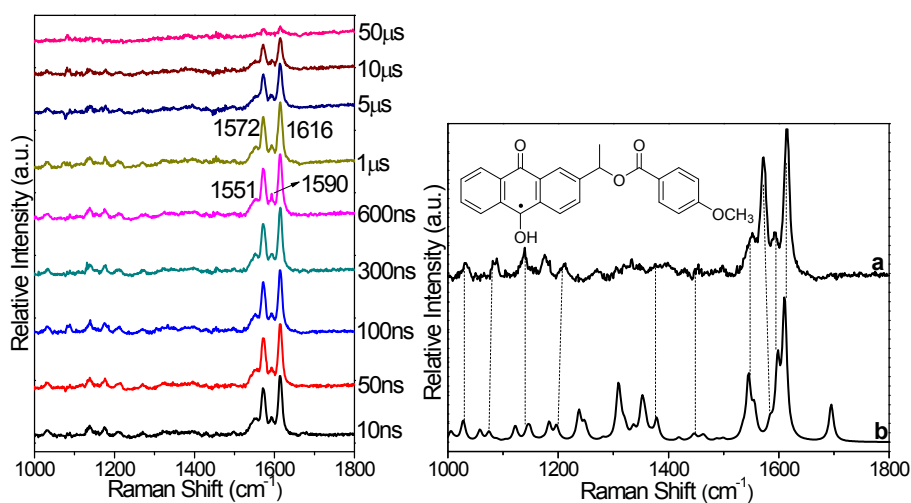

**Figure S4.** (Left) ns-TR<sup>3</sup> spectra of **1** in IPA. (Right) Comparison of (a) the 100 ns experimental Raman spectrum to (b) the calculated ketyl radical species of **1** (the scale factor is 0.968 and the half-width is  $8\text{ cm}^{-1}$ ).

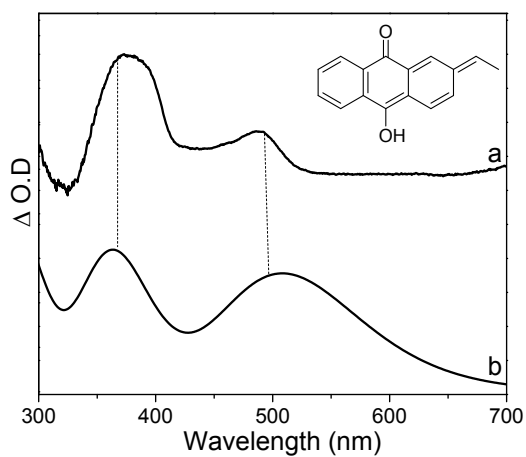

**Figure S5.** Comparison (a) ns-TA spectrum in MeOH seen at 14  $\mu$ s after photolysis of **1** to the (b) xylene form of 2-ethyl-AQ (the scale factor is 0.93 and the half-width is 2000  $\text{cm}^{-1}$ ).

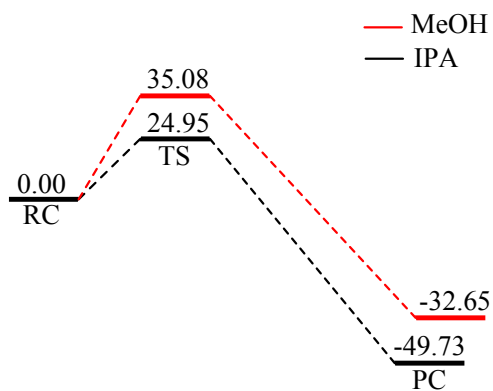

**Figure S6.** Reaction energy profiles found from (U)B3LYP/6-311G\*\* computations for the intermolecular HAT processes that can occur after photolysis of **1** in MeOH and IPA via a triplet state surface are shown (the energy unit is kJ/mol).

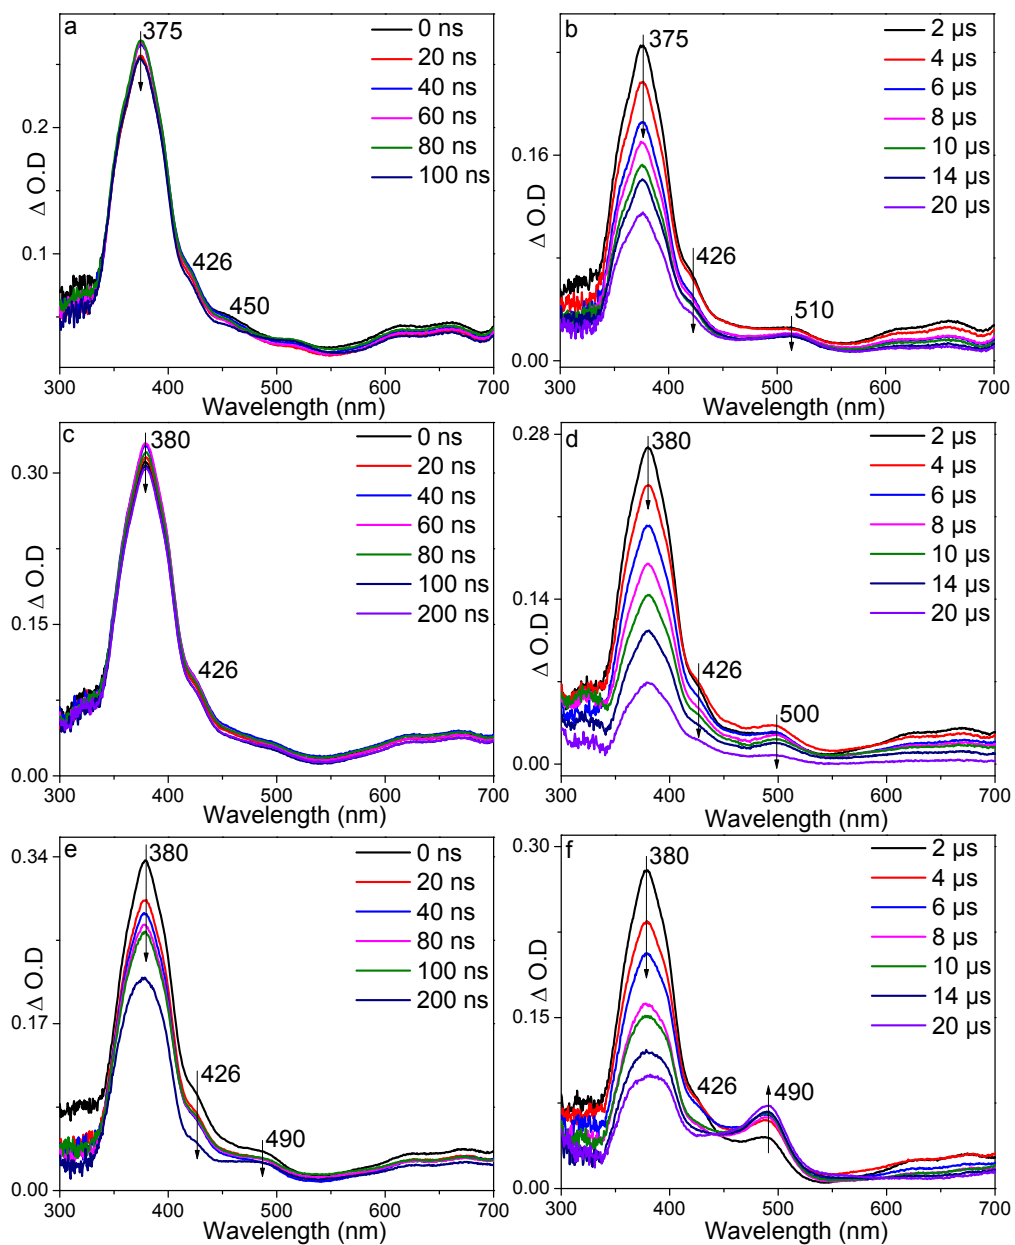

**Figure S7.** ns-TA results of **1** in (a-b) MeOH-ACN (v:v, 1:9), (c-d) MeOH-ACN (v:v, 1:1), (e-f) MeOH-ACN (v:v, 9:1) under the irradiation of 355 nm.

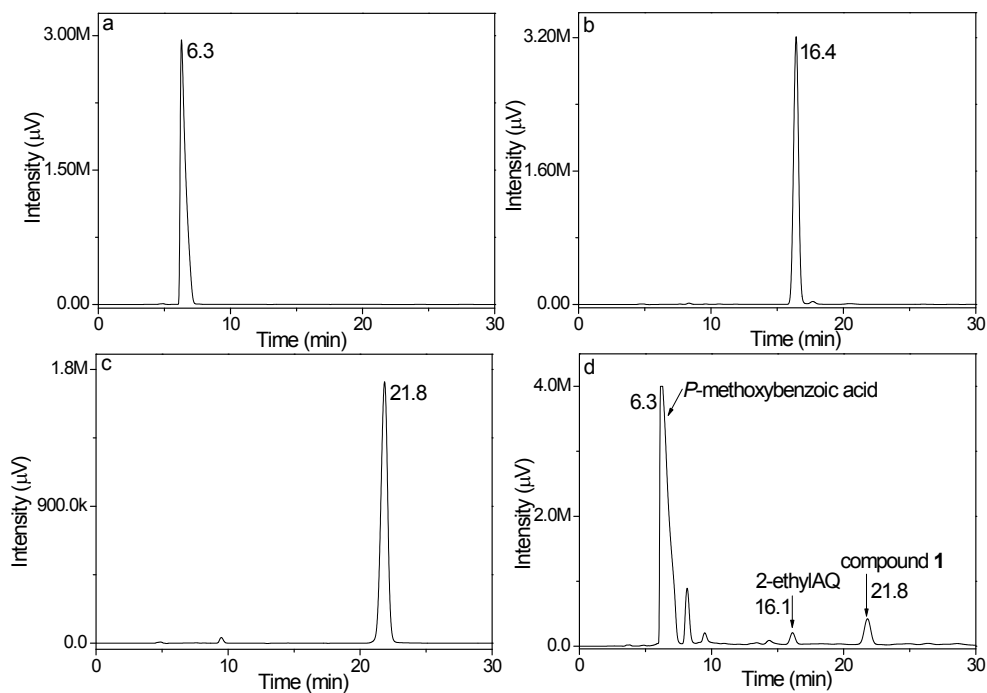

**Figure S8.** Recordings at 250 nm of HPLC analysis of the (a) *p*-methoxybenzoic acid, (b) 2-ethyl-AQ, (c) compound **1** and (d) photoproduct of **1** in THF-H<sub>2</sub>O upon 350 nm.

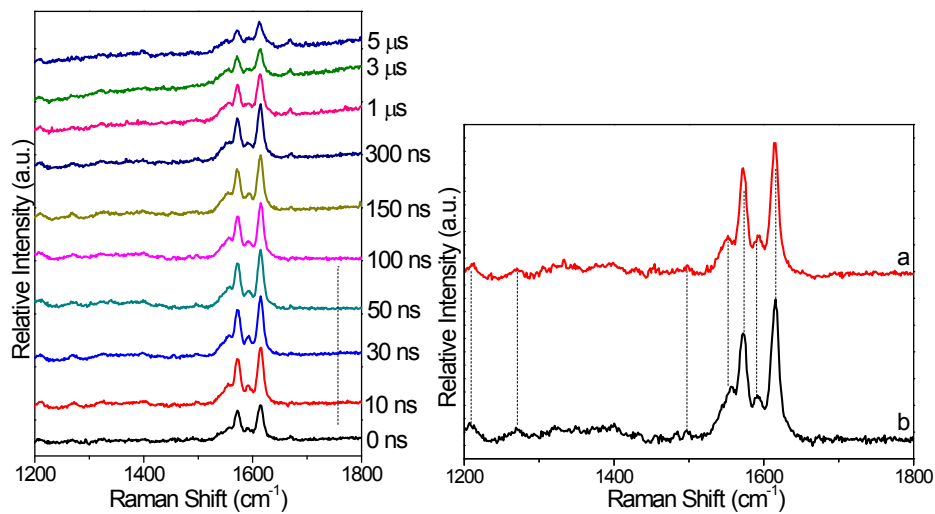

**Figure S9.** (Left) ns-TR<sup>3</sup> spectra of **1** in THF-H<sub>2</sub>O (v:v, 1:1). (Right) Comparison of the ns-TR<sup>3</sup> spectrum of **1** (a) in IPA at 100 ns with that (b) in THF-H<sub>2</sub>O (v:v, 1:1).

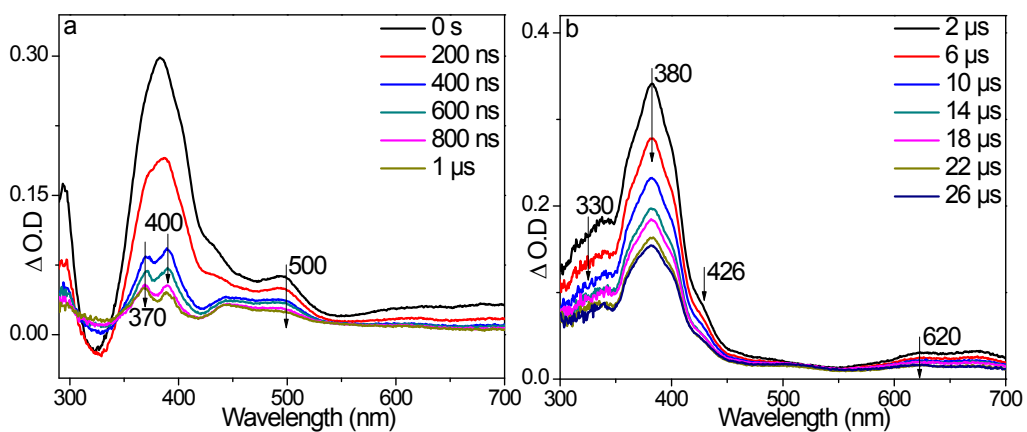

**Figure S10.** (a) Ns-TA results of **1** in THF-H<sub>2</sub>O (1:3) and (b) in THF-H<sub>2</sub>O (4:1) obtained at various time delays upon the irradiation of 355 nm.

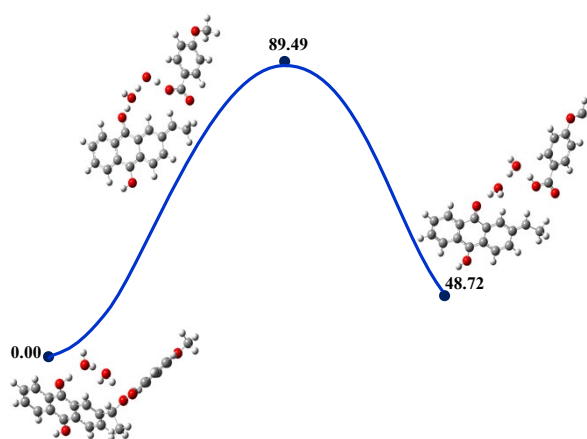

**Figure S11.** Reaction energy profile obtained from (U)B3LYP/6-311G\*\* calculations for the photodeprotection reaction of **1** via ground state surface by assistance of two water molecules is shown (the energy unit is kJ/mol).



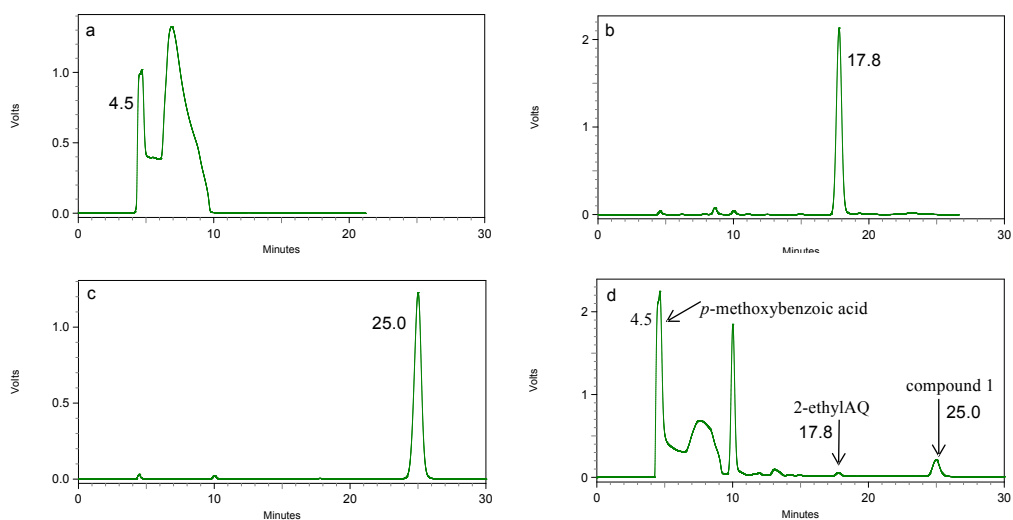

**Figure S12.** Recordings at 250 nm of HPLC analysis of the (a) *p*-methoxybenzoic acid, (b) 2-ethyl-AQ, (c) compound **1** and (d) photoproduct of **1** in MeOH-H<sub>2</sub>O upon 350 nm.

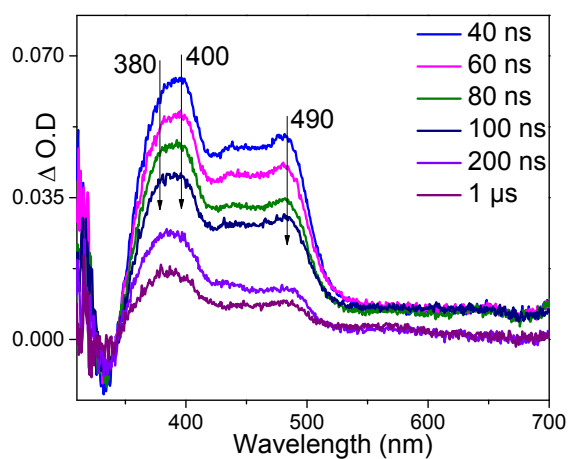

**Figure S13.** ns-TA spectra of **1** in MeOH-H<sub>2</sub>O (v:v, 1:1) under the irradiation of 355 nm.

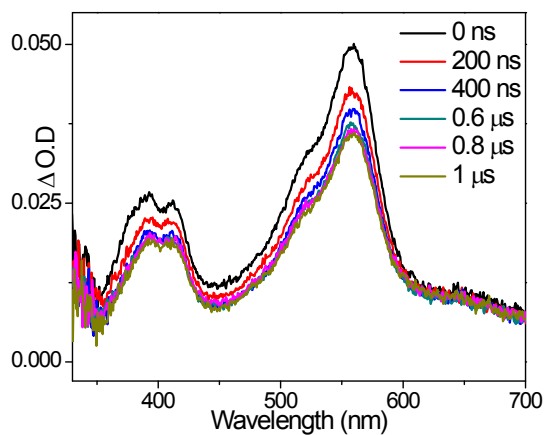

**Figure S14.** ns-TA results of **1** in DMSO under the irradiation of 355 nm

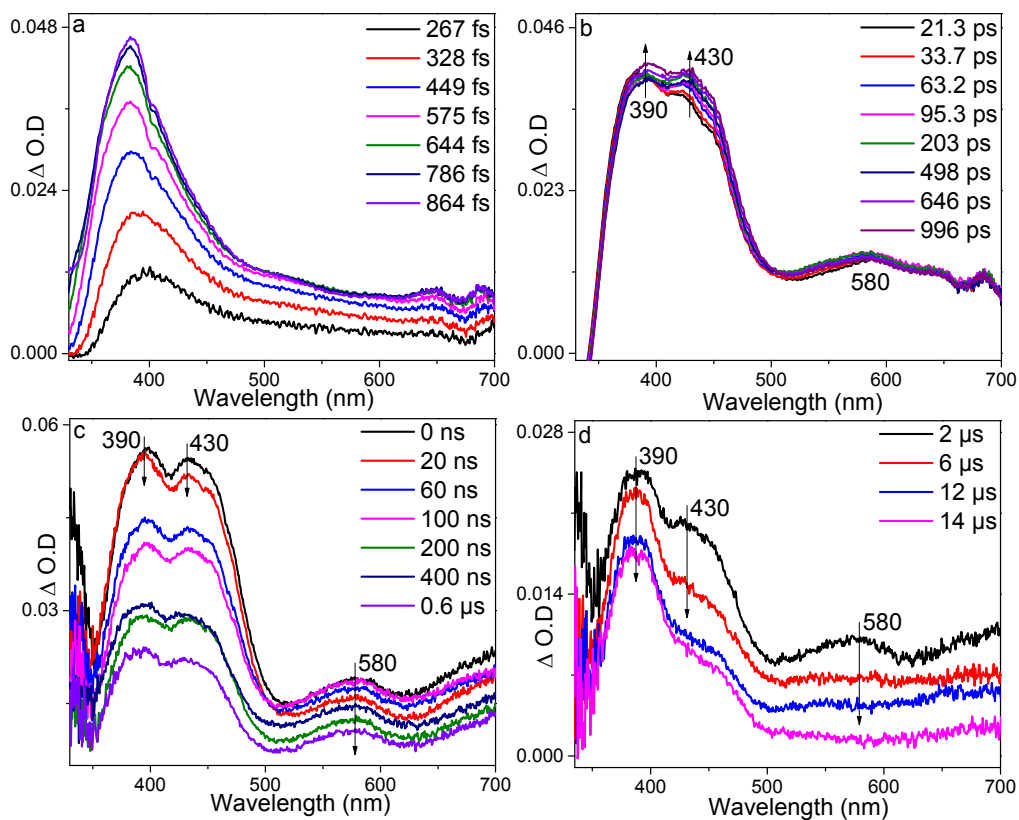

**Figure S15.** Fs-TA (a-b) and ns-TA (c-d) spectra of **1** in TFE under irradiation of 355 nm.

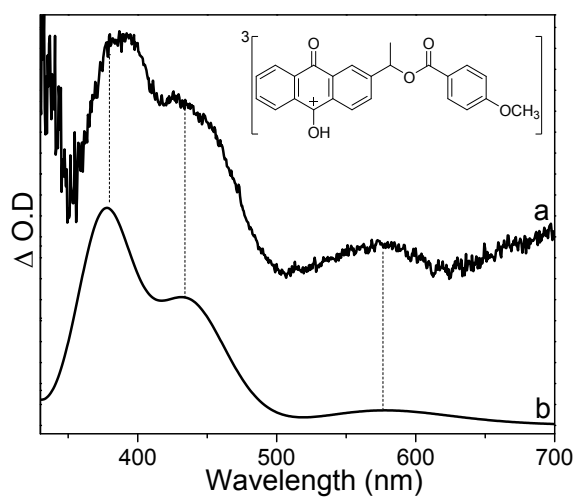

**Figure S16.** Comparison of the (a) ns-TA spectra of **1** recorded at 2  $\mu$ s with (b) computed UV-vis spectrum of AQH<sup>+</sup> (the scale factor is 1.0 and the half-width is 1500  $\text{cm}^{-1}$ ).

Cartesian coordinates, total energies, and vibrational zero-point energies for the optimized geometry for the compounds and intermediates considered in this paper are given.

Triplet state of compound **1**:

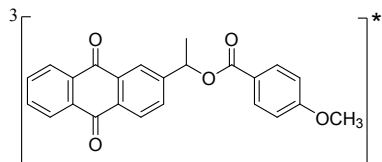

| Center Number | Atomic Number | Atomic Type | Coordinates (Angstroms) |           |           |
|---------------|---------------|-------------|-------------------------|-----------|-----------|
|               |               |             | X                       | Y         | Z         |
| 1             | 6             | 0           | 0.242452                | 0.16342   | -1.702261 |
| 2             | 6             | 0           | 1.275322                | -0.744965 | -1.714082 |
| 3             | 6             | 0           | 2.439394                | -0.508786 | -0.943436 |
| 4             | 6             | 0           | 2.523232                | 0.66915   | -0.166775 |
| 5             | 6             | 0           | 1.447724                | 1.56932   | -0.16828  |
| 6             | 6             | 0           | 0.307683                | 1.33863   | -0.919637 |
| 7             | 6             | 0           | 3.533599                | -1.442939 | -0.935935 |
| 8             | 6             | 0           | 3.712389                | 0.981747  | 0.650604  |
| 9             | 6             | 0           | 4.803456                | -0.013713 | 0.620915  |
| 10            | 6             | 0           | 4.717367                | -1.197168 | -0.150967 |
| 11            | 6             | 0           | 5.791419                | -2.118932 | -0.141541 |
| 12            | 1             | 0           | 5.719279                | -3.023445 | -0.733934 |
| 13            | 6             | 0           | 6.915178                | -1.862599 | 0.615912  |
| 14            | 6             | 0           | 7.004319                | -0.687689 | 1.38317   |
| 15            | 6             | 0           | 5.959411                | 0.218941  | 1.38054   |
| 16            | 1             | 0           | -0.644626               | -0.029512 | -2.294894 |
| 17            | 1             | 0           | 1.208276                | -1.644459 | -2.314854 |
| 18            | 1             | 0           | 1.5552                  | 2.447759  | 0.454319  |
| 19            | 1             | 0           | 7.733645                | -2.573589 | 0.617891  |
| 20            | 1             | 0           | 7.89054                 | -0.49407  | 1.976056  |
| 21            | 1             | 0           | 5.995212                | 1.132855  | 1.961349  |
| 22            | 8             | 0           | 3.792472                | 2.014037  | 1.31684   |
| 23            | 8             | 0           | 3.453128                | -2.530621 | -1.646346 |
| 24            | 6             | 0           | -0.847738               | 2.324073  | -0.98519  |
| 25            | 6             | 0           | -0.777834               | 3.522318  | -0.045514 |
| 26            | 8             | 0           | -2.131921               | 1.631629  | -0.885156 |
| 27            | 1             | 0           | 0.074299                | 4.153041  | -0.309828 |

|                                              |   |   |              |           |           |
|----------------------------------------------|---|---|--------------|-----------|-----------|
| 28                                           | 1 | 0 | -1.6848      | 4.119281  | -0.160736 |
| 29                                           | 1 | 0 | -0.687129    | 3.214484  | 0.9945    |
| 30                                           | 6 | 0 | -2.4451      | 0.992603  | 0.271637  |
| 31                                           | 8 | 0 | -1.721054    | 0.965461  | 1.239221  |
| 32                                           | 6 | 0 | -3.774492    | 0.334506  | 0.198357  |
| 33                                           | 6 | 0 | -4.60233     | 0.404772  | -0.933156 |
| 34                                           | 6 | 0 | -4.212769    | -0.384823 | 1.311829  |
| 35                                           | 6 | 0 | -5.830803    | -0.229828 | -0.944241 |
| 36                                           | 1 | 0 | -4.273316    | 0.962888  | -1.79949  |
| 37                                           | 6 | 0 | -5.445087    | -1.027977 | 1.312374  |
| 38                                           | 1 | 0 | -3.569182    | -0.433317 | 2.181538  |
| 39                                           | 6 | 0 | -6.262548    | -0.95287  | 0.177915  |
| 40                                           | 1 | 0 | -6.482562    | -0.185125 | -1.808078 |
| 41                                           | 1 | 0 | -5.75664     | -1.578521 | 2.189449  |
| 42                                           | 1 | 0 | -0.898174    | 2.69909   | -2.011683 |
| 43                                           | 8 | 0 | -7.480891    | -1.539915 | 0.065336  |
| 44                                           | 6 | 0 | -7.985982    | -2.287393 | 1.166139  |
| 45                                           | 1 | 0 | -8.108674    | -1.65789  | 2.053749  |
| 46                                           | 1 | 0 | -8.959161    | -2.657761 | 0.849352  |
| 47                                           | 1 | 0 | -7.335623    | -3.135227 | 1.40587   |
| -----                                        |   |   |              |           |           |
| Sum of electronic and zero-point Energies=   |   |   | -1301.417311 |           |           |
| Sum of electronic and thermal Free Energies= |   |   | -1301.475286 |           |           |

Ketyl radical species of compound **1**

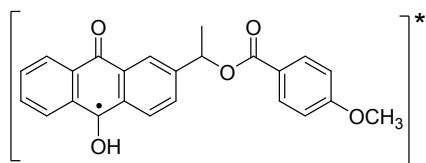

| Center<br>Number | Atomic<br>Number | Atomic<br>Type | Coordinates (Angstroms) |           |           |
|------------------|------------------|----------------|-------------------------|-----------|-----------|
|                  |                  |                | X                       | Y         | Z         |
| 1                | 6                | 0              | -0.240505               | 0.166089  | 1.722561  |
| 2                | 6                | 0              | -1.278879               | -0.737365 | 1.71756   |
| 3                | 6                | 0              | -2.435601               | -0.496334 | 0.936161  |
| 4                | 6                | 0              | -2.494894               | 0.694122  | 0.165572  |
| 5                | 6                | 0              | -1.41773                | 1.588867  | 0.181995  |
| 6                | 6                | 0              | -0.288213               | 1.34619   | 0.947178  |
| 7                | 6                | 0              | -3.52415                | -1.4124   | 0.90942   |
| 8                | 6                | 0              | -3.675743               | 1.00933   | -0.660901 |
| 9                | 6                | 0              | -4.772522               | 0.016924  | -0.65425  |
| 10               | 6                | 0              | -4.689601               | -1.175606 | 0.121906  |
| 11               | 6                | 0              | -5.780546               | -2.080396 | 0.075005  |
| 12               | 1                | 0              | -5.767158               | -3.005557 | 0.644468  |
| 13               | 6                | 0              | -6.892445               | -1.81488  | -0.698108 |
| 14               | 6                | 0              | -6.964504               | -0.635834 | -1.457721 |
| 15               | 6                | 0              | -5.911687               | 0.262906  | -1.429245 |
| 16               | 1                | 0              | 0.638795                | -0.034587 | 2.324453  |
| 17               | 1                | 0              | -1.223903               | -1.639186 | 2.312635  |
| 18               | 1                | 0              | -1.508937               | 2.472112  | -0.435689 |
| 19               | 1                | 0              | -7.713189               | -2.522828 | -0.717619 |
| 20               | 1                | 0              | -7.840305               | -0.433759 | -2.062933 |
| 21               | 1                | 0              | -5.933893               | 1.180841  | -2.003757 |
| 22               | 8                | 0              | -3.750268               | 2.045669  | -1.32284  |
| 23               | 8                | 0              | -3.387379               | -2.52337  | 1.675101  |
| 24               | 6                | 0              | 0.873318                | 2.32205   | 1.035712  |
| 25               | 6                | 0              | 0.812258                | 3.544289  | 0.127127  |
| 26               | 8                | 0              | 2.15443                 | 1.623569  | 0.917876  |
| 27               | 1                | 0              | -0.038552               | 4.170916  | 0.405202  |
| 28               | 1                | 0              | 1.721391                | 4.134334  | 0.260384  |
| 29               | 1                | 0              | 0.723312                | 3.26421   | -0.920777 |
| 30               | 6                | 0              | 2.466098                | 1.014968  | -0.2542   |
| 31               | 8                | 0              | 1.74915                 | 1.02331   | -1.227463 |

|    |   |   |           |           |           |
|----|---|---|-----------|-----------|-----------|
| 32 | 6 | 0 | 3.789009  | 0.340846  | -0.193577 |
| 33 | 6 | 0 | 4.603402  | 0.353076  | 0.94954   |
| 34 | 6 | 0 | 4.234085  | -0.333507 | -1.332031 |
| 35 | 6 | 0 | 5.8257    | -0.293807 | 0.947298  |
| 36 | 1 | 0 | 4.268644  | 0.875398  | 1.835765  |
| 37 | 6 | 0 | 5.460707  | -0.987553 | -1.346709 |
| 38 | 1 | 0 | 3.600138  | -0.33782  | -2.210125 |
| 39 | 6 | 0 | 6.264813  | -0.970229 | -0.200601 |
| 40 | 1 | 0 | 6.46687   | -0.294195 | 1.820207  |
| 41 | 1 | 0 | 5.777856  | -1.501665 | -2.243668 |
| 42 | 1 | 0 | 0.927812  | 2.670574  | 2.071232  |
| 43 | 8 | 0 | 7.477033  | -1.573148 | -0.099935 |
| 44 | 6 | 0 | 7.989179  | -2.273843 | -1.227538 |
| 45 | 1 | 0 | 8.125858  | -1.606206 | -2.084784 |
| 46 | 1 | 0 | 8.956434  | -2.664967 | -0.917439 |
| 47 | 1 | 0 | 7.336205  | -3.105657 | -1.512396 |
| 48 | 1 | 0 | -4.170401 | -3.077613 | 1.599998  |

---

Sum of electronic and zero-point Energies= -1302.078941

Sum of electronic and thermal Free Energies= -1302.136733

Ground state of dihydroxy anthraquinone of compound 1

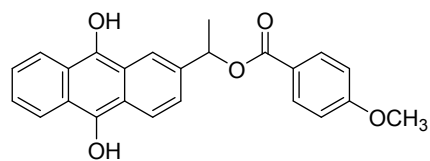

| Center<br>Number | Atomic<br>Number | Atomic<br>Type | Coordinates (Angstroms) |           |           |
|------------------|------------------|----------------|-------------------------|-----------|-----------|
|                  |                  |                | X                       | Y         | Z         |
| 1                | 6                | 0              | -0.254737               | 0.194714  | 1.814597  |
| 2                | 6                | 0              | -1.277354               | -0.708592 | 1.808872  |
| 3                | 6                | 0              | -2.423291               | -0.509653 | 0.982469  |
| 4                | 6                | 0              | -2.478036               | 0.671427  | 0.166886  |
| 5                | 6                | 0              | -1.37865                | 1.580795  | 0.190875  |
| 6                | 6                | 0              | -0.288835               | 1.360852  | 0.988306  |
| 7                | 6                | 0              | -3.478071               | -1.433389 | 0.939792  |
| 8                | 6                | 0              | -3.609783               | 0.909298  | -0.628703 |
| 9                | 6                | 0              | -4.683702               | 0.004396  | -0.649748 |
| 10               | 6                | 0              | -4.596906               | -1.216567 | 0.118535  |
| 11               | 6                | 0              | -5.661645               | -2.161502 | 0.004618  |
| 12               | 1                | 0              | -5.584037               | -3.120498 | 0.506368  |
| 13               | 6                | 0              | -6.768778               | -1.905788 | -0.756284 |
| 14               | 6                | 0              | -6.886368               | -0.673745 | -1.453473 |
| 15               | 6                | 0              | -5.874348               | 0.244461  | -1.401319 |
| 16               | 1                | 0              | 0.609689                | 0.026865  | 2.447268  |
| 17               | 1                | 0              | -1.240538               | -1.591744 | 2.432635  |
| 18               | 1                | 0              | -1.435228               | 2.447151  | -0.451801 |
| 19               | 1                | 0              | -7.55978                | -2.642978 | -0.830131 |
| 20               | 1                | 0              | -7.78168                | -0.464184 | -2.027137 |
| 21               | 1                | 0              | -5.997472               | 1.188657  | -1.921472 |
| 22               | 8                | 0              | -3.627357               | 2.072556  | -1.359283 |
| 23               | 8                | 0              | -3.351288               | -2.558375 | 1.716551  |
| 24               | 6                | 0              | 0.874999                | 2.330703  | 1.08634   |
| 25               | 6                | 0              | 0.814417                | 3.57758   | 0.212424  |
| 26               | 8                | 0              | 2.153729                | 1.628063  | 0.940232  |
| 27               | 1                | 0              | -0.035221               | 4.19633   | 0.511443  |
| 28               | 1                | 0              | 1.72503                 | 4.162412  | 0.359211  |
| 29               | 1                | 0              | 0.724183                | 3.327661  | -0.842854 |
| 30               | 6                | 0              | 2.467998                | 1.060038  | -0.249294 |
| 31               | 8                | 0              | 1.770302                | 1.123332  | -1.23484  |
| 32               | 6                | 0              | 3.776661                | 0.355593  | -0.196405 |
| 33               | 6                | 0              | 4.568897                | 0.29704   | 0.960547  |

|                                              |   |   |          |              |           |
|----------------------------------------------|---|---|----------|--------------|-----------|
| 34                                           | 6 | 0 | 4.230099 | -0.274162    | -1.356629 |
| 35                                           | 6 | 0 | 5.778388 | -0.373722    | 0.949991  |
| 36                                           | 1 | 0 | 4.226832 | 0.782971     | 1.864466  |
| 37                                           | 6 | 0 | 5.443871 | -0.951882    | -1.380045 |
| 38                                           | 1 | 0 | 3.61231  | -0.225179    | -2.244814 |
| 39                                           | 6 | 0 | 6.226269 | -1.004106    | -0.220274 |
| 40                                           | 1 | 0 | 6.402091 | -0.428905    | 1.833776  |
| 41                                           | 1 | 0 | 5.767371 | -1.430723    | -2.294099 |
| 42                                           | 1 | 0 | 0.94246  | 2.651148     | 2.130147  |
| 43                                           | 8 | 0 | 7.425301 | -1.635219    | -0.126486 |
| 44                                           | 6 | 0 | 7.941902 | -2.296844    | -1.275012 |
| 45                                           | 1 | 0 | 8.105095 | -1.596337    | -2.100924 |
| 46                                           | 1 | 0 | 8.896555 | -2.719874    | -0.967543 |
| 47                                           | 1 | 0 | 7.278048 | -3.1029      | -1.605368 |
| 48                                           | 1 | 0 | -4.17529 | 1.94939      | -2.140112 |
| 49                                           | 1 | 0 | -4.22389 | -2.913789    | 1.909153  |
| -----                                        |   |   |          |              |           |
| Sum of electronic and zero-point Energies=   |   |   |          | -1302.676419 |           |
| Sum of electronic and thermal Free Energies= |   |   |          | -1302.733015 |           |



Triplet state of dihydroxy anthraquinone of compound **1**

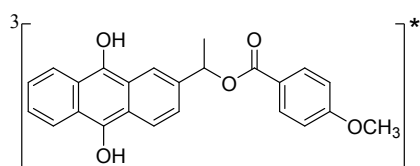

| Center<br>Number | Atomic<br>Number | Atomic<br>Type | Coordinates (Angstroms) |           |           |
|------------------|------------------|----------------|-------------------------|-----------|-----------|
|                  |                  |                | X                       | Y         | Z         |
| 1                | 6                | 0              | -7.271018               | 1.565688  | -0.461042 |
| 2                | 6                | 0              | -5.993597               | 2.058947  | -0.13964  |
| 3                | 6                | 0              | -4.895962               | 1.198947  | -0.053307 |
| 4                | 6                | 0              | -5.076439               | -0.199962 | -0.311554 |
| 5                | 6                | 0              | -6.362949               | -0.666719 | -0.605345 |
| 6                | 6                | 0              | -7.456685               | 0.214861  | -0.68577  |
| 7                | 6                | 0              | -3.583791               | 1.666778  | 0.286213  |
| 8                | 6                | 0              | -3.922929               | -1.051798 | -0.269888 |
| 9                | 6                | 0              | -2.62559                | -0.594214 | 0.131214  |
| 10               | 6                | 0              | -2.458415               | 0.795465  | 0.444003  |
| 11               | 6                | 0              | -1.198052               | 1.23171   | 0.86525   |
| 12               | 1                | 0              | -1.036371               | 2.26512   | 1.15692   |
| 13               | 6                | 0              | -0.106219               | 0.347922  | 0.951531  |
| 14               | 6                | 0              | -0.25847                | -0.986485 | 0.621967  |
| 15               | 6                | 0              | -1.528664               | -1.451727 | 0.213847  |
| 16               | 1                | 0              | -8.108389               | 2.250854  | -0.52386  |
| 17               | 1                | 0              | -5.846891               | 3.114152  | 0.04695   |
| 18               | 1                | 0              | -6.548891               | -1.72597  | -0.755084 |
| 19               | 1                | 0              | -8.440476               | -0.174736 | -0.919481 |
| 20               | 1                | 0              | 0.859006                | 0.720498  | 1.269304  |
| 21               | 1                | 0              | -1.66247                | -2.492392 | -0.053722 |
| 22               | 8                | 0              | -4.01328                | -2.369096 | -0.589986 |
| 23               | 1                | 0              | -4.852403               | -2.536387 | -1.032703 |
| 24               | 8                | 0              | -3.464931               | 3.006826  | 0.477854  |
| 25               | 1                | 0              | -2.532013               | 3.245458  | 0.507212  |
| 26               | 6                | 0              | 0.876524                | -1.98441  | 0.735693  |
| 27               | 8                | 0              | 2.161315                | -1.314767 | 0.665562  |
| 28               | 6                | 0              | 2.758636                | -1.228186 | -0.552021 |
| 29               | 8                | 0              | 2.28681                 | -1.694141 | -1.562379 |
| 30               | 6                | 0              | 4.054682                | -0.506505 | -0.488437 |
| 31               | 6                | 0              | 4.589802                | -0.009928 | 0.701517  |
| 32               | 6                | 0              | 4.769592                | -0.324013 | -1.682348 |

|                                              |   |   |           |              |           |
|----------------------------------------------|---|---|-----------|--------------|-----------|
| 33                                           | 6 | 0 | 5.811315  | 0.657693     | 0.712973  |
| 34                                           | 1 | 0 | 4.047761  | -0.150306    | 1.627256  |
| 35                                           | 6 | 0 | 5.982125  | 0.337544     | -1.68405  |
| 36                                           | 1 | 0 | 4.34961   | -0.713022    | -2.601488 |
| 37                                           | 6 | 0 | 6.513985  | 0.834973     | -0.484381 |
| 38                                           | 1 | 0 | 6.202878  | 1.030592     | 1.649511  |
| 39                                           | 1 | 0 | 6.544969  | 0.48689      | -2.597206 |
| 40                                           | 8 | 0 | 7.70957   | 1.469277     | -0.590087 |
| 41                                           | 6 | 0 | 8.310519  | 1.999819     | 0.585183  |
| 42                                           | 1 | 0 | 7.677984  | 2.765131     | 1.047483  |
| 43                                           | 1 | 0 | 8.524901  | 1.212296     | 1.315486  |
| 44                                           | 1 | 0 | 9.244979  | 2.453365     | 0.259939  |
| 45                                           | 6 | 0 | 0.863395  | -2.747667    | 2.058666  |
| 46                                           | 1 | 0 | 1.677823  | -3.475287    | 2.08503   |
| 47                                           | 1 | 0 | 0.976764  | -2.058172    | 2.898371  |
| 48                                           | 1 | 0 | -0.084531 | -3.277245    | 2.175807  |
| 49                                           | 1 | 0 | 0.81912   | -2.678032    | -0.105084 |
| <hr/>                                        |   |   |           |              |           |
| Sum of electronic and zero-point Energies=   |   |   |           | -1302.629249 |           |
| Sum of electronic and thermal Free Energies= |   |   |           | -1302.688153 |           |

Ground state of xylylene form of 2-ethyl-AQ

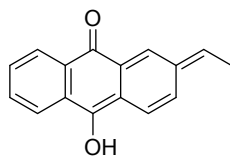

| Center Number                                | Atomic Number | Atomic Type | Coordinates (Angstroms) |           |           |
|----------------------------------------------|---------------|-------------|-------------------------|-----------|-----------|
|                                              |               |             | X                       | Y         | Z         |
| 1                                            | 6             | 0           | 2.861054                | 1.19415   | -0.018173 |
| 2                                            | 6             | 0           | 1.621008                | 1.730415  | -0.041616 |
| 3                                            | 6             | 0           | 0.432782                | 0.906892  | -0.027283 |
| 4                                            | 6             | 0           | 0.620846                | -0.534627 | -0.010773 |
| 5                                            | 6             | 0           | 1.874466                | -1.061537 | 0.00717   |
| 6                                            | 6             | 0           | 3.07014                 | -0.24716  | 0.015665  |
| 7                                            | 6             | 0           | -0.83009                | 1.437373  | -0.027763 |
| 8                                            | 6             | 0           | -0.547934               | -1.454902 | -0.043286 |
| 9                                            | 6             | 0           | -1.887521               | -0.810199 | -0.030009 |
| 10                                           | 6             | 0           | -2.016951               | 0.600365  | 0.006693  |
| 11                                           | 6             | 0           | -3.311595               | 1.147321  | 0.088996  |
| 12                                           | 1             | 0           | -3.452042               | 2.218481  | 0.185918  |
| 13                                           | 6             | 0           | -4.432797               | 0.329656  | 0.091345  |
| 14                                           | 6             | 0           | -4.296276               | -1.059207 | 0.024583  |
| 15                                           | 6             | 0           | -3.026709               | -1.618153 | -0.026364 |
| 16                                           | 1             | 0           | 3.721836                | 1.850937  | -0.028398 |
| 17                                           | 1             | 0           | 1.489079                | 2.804452  | -0.067917 |
| 18                                           | 1             | 0           | 1.970098                | -2.142229 | 0.009328  |
| 19                                           | 1             | 0           | -5.418866               | 0.775834  | 0.156026  |
| 20                                           | 1             | 0           | -5.17426                | -1.694308 | 0.026217  |
| 21                                           | 1             | 0           | -2.880342               | -2.691005 | -0.057034 |
| 22                                           | 8             | 0           | -0.423348               | -2.672851 | -0.069575 |
| 23                                           | 8             | 0           | -0.965568               | 2.801078  | -0.023794 |
| 24                                           | 6             | 0           | 4.290188                | -0.857699 | 0.046201  |
| 25                                           | 6             | 0           | 5.63599                 | -0.212877 | 0.061369  |
| 26                                           | 1             | 0           | 6.199148                | -0.519081 | 0.951489  |
| 27                                           | 1             | 0           | 6.229641                | -0.539563 | -0.801273 |
| 28                                           | 1             | 0           | 5.595568                | 0.87604   | 0.048393  |
| 29                                           | 1             | 0           | 4.292131                | -1.944922 | 0.062345  |
| 30                                           | 1             | 0           | -1.800271               | 3.040689  | -0.438672 |
| Sum of electronic and zero-point Energies=   |               |             | -767.318427             |           |           |
| Sum of electronic and thermal Free Energies= |               |             | -767.359990             |           |           |

Triplet state of coupling complex

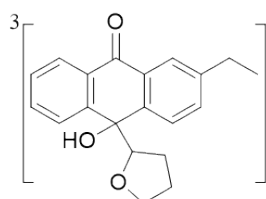

| Center<br>Number | Atomic<br>Number | Atomic<br>Type | Coordinates (Angstroms) |           |           |
|------------------|------------------|----------------|-------------------------|-----------|-----------|
|                  |                  |                | X                       | Y         | Z         |
| 1                | 6                | 0              | 3.693058                | -2.013056 | 0.894983  |
| 2                | 6                | 0              | 2.87101                 | -0.91635  | 1.160782  |
| 3                | 6                | 0              | 1.63536                 | -0.782479 | 0.538795  |
| 4                | 6                | 0              | 1.181294                | -1.814412 | -0.320805 |
| 5                | 6                | 0              | 2.032433                | -2.904333 | -0.612297 |
| 6                | 6                | 0              | 3.275979                | -2.993946 | -0.009187 |
| 7                | 6                | 0              | 0.796541                | 0.474089  | 0.694982  |
| 8                | 6                | 0              | -0.176542               | -1.760212 | -0.805165 |
| 9                | 6                | 0              | -1.153992               | -0.905876 | -0.171607 |
| 10               | 6                | 0              | -0.691723               | 0.123636  | 0.683064  |
| 11               | 6                | 0              | -1.625943               | 0.83383   | 1.423893  |
| 12               | 1                | 0              | -1.281468               | 1.591106  | 2.116217  |
| 13               | 6                | 0              | -2.992024               | 0.590152  | 1.286283  |
| 14               | 6                | 0              | -3.46682                | -0.382598 | 0.393039  |
| 15               | 6                | 0              | -2.540107               | -1.126644 | -0.326022 |
| 16               | 1                | 0              | 4.654959                | -2.098031 | 1.386924  |
| 17               | 1                | 0              | 3.182817                | -0.145165 | 1.852906  |
| 18               | 1                | 0              | 1.68499                 | -3.686965 | -1.27581  |
| 19               | 1                | 0              | 3.915014                | -3.843473 | -0.223029 |
| 20               | 1                | 0              | -3.697844               | 1.163815  | 1.878012  |
| 21               | 1                | 0              | -2.87597                | -1.921213 | -0.983299 |
| 22               | 6                | 0              | -4.952098               | -0.606928 | 0.210659  |
| 23               | 1                | 0              | -5.457212               | -0.492844 | 1.175303  |
| 24               | 1                | 0              | -5.127091               | -1.637794 | -0.112127 |
| 25               | 6                | 0              | -5.581273               | 0.358723  | -0.808699 |
| 26               | 1                | 0              | -6.653653               | 0.171146  | -0.9135   |
| 27               | 1                | 0              | -5.44784                | 1.398654  | -0.498969 |
| 28               | 1                | 0              | -5.118149               | 0.243742  | -1.792254 |
| 29               | 8                | 0              | -0.55817                | -2.581334 | -1.753333 |
| 30               | 8                | 0              | 1.17738                 | 1.153823  | 1.878538  |
| 31               | 1                | 0              | 0.94129                 | 2.079207  | 1.716636  |
| 32               | 6                | 0              | 1.075571                | 1.435389  | -0.517852 |

|                                              |   |   |          |             |           |
|----------------------------------------------|---|---|----------|-------------|-----------|
| 33                                           | 8 | 0 | 0.501001 | 2.708064    | -0.161927 |
| 34                                           | 6 | 0 | 2.539016 | 1.745491    | -0.838104 |
| 35                                           | 1 | 0 | 0.564282 | 1.038923    | -1.402535 |
| 36                                           | 6 | 0 | 1.289742 | 3.78369     | -0.710985 |
| 37                                           | 6 | 0 | 2.427837 | 3.124759    | -1.501708 |
| 38                                           | 1 | 0 | 2.995686 | 0.992254    | -1.479919 |
| 39                                           | 1 | 0 | 3.117417 | 1.80531     | 0.087413  |
| 40                                           | 1 | 0 | 0.643704 | 4.410875    | -1.330938 |
| 41                                           | 1 | 0 | 1.667708 | 4.391577    | 0.118139  |
| 42                                           | 1 | 0 | 2.151087 | 3.017366    | -2.554269 |
| 43                                           | 1 | 0 | 3.354668 | 3.699524    | -1.455408 |
| <hr/>                                        |   |   |          |             |           |
| Sum of electronic and zero-point Energies=   |   |   |          | -999.649987 |           |
| Sum of electronic and thermal Free Energies= |   |   |          | -999.699923 |           |

The reaction complex of water-assisted photodeprotection process of compound **1** via the triplet surface:

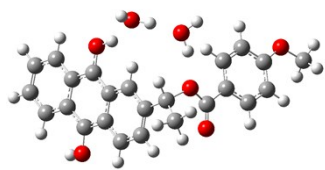

| Center Number | Atomic Number | Atomic Type | Coordinates (Angstroms) |           |           |
|---------------|---------------|-------------|-------------------------|-----------|-----------|
|               |               |             | X                       | Y         | Z         |
| 1             | 6             | 0           | 6.491031                | -2.205795 | -0.833922 |
| 2             | 6             | 0           | 5.767479                | -1.198584 | -1.496443 |
| 3             | 6             | 0           | 4.586488                | -0.678396 | -0.954066 |
| 4             | 6             | 0           | 4.137579                | -1.161049 | 0.31748   |
| 5             | 6             | 0           | 4.87088                 | -2.164223 | 0.960065  |
| 6             | 6             | 0           | 6.039526                | -2.686768 | 0.381638  |
| 7             | 6             | 0           | 3.793241                | 0.317093  | -1.616996 |
| 8             | 6             | 0           | 2.948284                | -0.599845 | 0.902938  |
| 9             | 6             | 0           | 2.213806                | 0.463281  | 0.270382  |
| 10            | 6             | 0           | 2.638952                | 0.913756  | -1.024922 |
| 11            | 6             | 0           | 1.911969                | 1.919795  | -1.67142  |
| 12            | 1             | 0           | 2.231399                | 2.246924  | -2.651503 |
| 13            | 6             | 0           | 0.779512                | 2.496791  | -1.074369 |
| 14            | 6             | 0           | 0.369004                | 2.090223  | 0.183805  |
| 15            | 6             | 0           | 1.101842                | 1.077116  | 0.84997   |
| 16            | 1             | 0           | 7.399947                | -2.593678 | -1.27865  |
| 17            | 1             | 0           | 6.165102                | -0.817089 | -2.432535 |
| 18            | 1             | 0           | 4.521653                | -2.530885 | 1.915305  |
| 19            | 1             | 0           | 6.589195                | -3.465119 | 0.898713  |
| 20            | 1             | 0           | 0.224333                | 3.250609  | -1.616292 |
| 21            | 1             | 0           | 0.78194                 | 0.780577  | 1.840208  |
| 22            | 6             | 0           | -0.842601               | 2.648129  | 0.888936  |
| 23            | 8             | 0           | -1.982665               | 1.67831   | 0.792461  |
| 24            | 6             | 0           | -2.600089               | 1.473571  | -0.405525 |
| 25            | 8             | 0           | -2.421196               | 2.17474   | -1.371909 |
| 26            | 6             | 0           | -3.53027                | 0.313022  | -0.391592 |
| 27            | 6             | 0           | -3.513991               | -0.691077 | 0.589139  |
| 28            | 6             | 0           | -4.437562               | 0.201466  | -1.44849  |
| 29            | 6             | 0           | -4.388779               | -1.760125 | 0.518052  |

|    |   |   |           |           |           |
|----|---|---|-----------|-----------|-----------|
| 30 | 1 | 0 | -2.803263 | -0.647062 | 1.402832  |
| 31 | 6 | 0 | -5.328305 | -0.862434 | -1.526176 |
| 32 | 1 | 0 | -4.431992 | 0.965473  | -2.215821 |
| 33 | 6 | 0 | -5.307899 | -1.853306 | -0.537055 |
| 34 | 1 | 0 | -4.377138 | -2.548652 | 1.260372  |
| 35 | 1 | 0 | -6.022358 | -0.914619 | -2.35377  |
| 36 | 8 | 0 | -6.124142 | -2.936018 | -0.511435 |
| 37 | 6 | 0 | -7.068902 | -3.108952 | -1.562396 |
| 38 | 1 | 0 | -6.57233  | -3.204133 | -2.533577 |
| 39 | 1 | 0 | -7.596599 | -4.033192 | -1.334948 |
| 40 | 1 | 0 | -7.78507  | -2.281224 | -1.595994 |
| 41 | 1 | 0 | -0.6537   | 2.598919  | 1.963063  |
| 42 | 6 | 0 | -1.268337 | 4.071398  | 0.555393  |
| 43 | 1 | 0 | -2.173124 | 4.326267  | 1.112894  |
| 44 | 1 | 0 | -0.473642 | 4.753654  | 0.868513  |
| 45 | 1 | 0 | -1.465576 | 4.212784  | -0.503422 |
| 46 | 8 | 0 | 2.60114   | -1.126426 | 2.089251  |
| 47 | 8 | 0 | 4.124245  | 0.760973  | -2.858438 |
| 48 | 1 | 0 | 4.793536  | 0.180826  | -3.23681  |
| 49 | 1 | 0 | 1.751318  | -0.820321 | 2.471008  |
| 50 | 8 | 0 | 0.526438  | -0.536505 | 3.755027  |
| 51 | 1 | 0 | -0.393689 | -0.230385 | 3.630843  |
| 52 | 1 | 0 | 0.890778  | 0.042216  | 4.431934  |
| 53 | 8 | 0 | -1.95321  | 0.640303  | 3.40613   |
| 54 | 1 | 0 | -2.138874 | 0.993172  | 2.517525  |
| 55 | 1 | 0 | -2.803859 | 0.4014    | 3.784854  |

---

Sum of electronic and zero-point Energies= -1455.510221  
Sum of electronic and thermal Free Energies= -1455.574891

The transition state of photodeprotection process of compound **1** via the triplet surface:

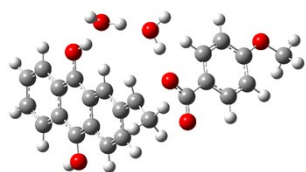

| Center Number | Atomic Number | Atomic Type | Coordinates (Angstroms) |           |           |
|---------------|---------------|-------------|-------------------------|-----------|-----------|
|               |               |             | X                       | Y         | Z         |
| 1             | 6             | 0           | -6.021608               | -2.748938 | 0.324534  |
| 2             | 6             | 0           | -5.330134               | -1.9387   | 1.219815  |
| 3             | 6             | 0           | -4.283316               | -1.110564 | 0.791706  |
| 4             | 6             | 0           | -3.936328               | -1.085099 | -0.593287 |
| 5             | 6             | 0           | -4.643203               | -1.919581 | -1.481623 |
| 6             | 6             | 0           | -5.667916               | -2.737477 | -1.026913 |
| 7             | 6             | 0           | -3.527712               | -0.276947 | 1.692158  |
| 8             | 6             | 0           | -2.886076               | -0.226778 | -1.057589 |
| 9             | 6             | 0           | -2.195167               | 0.661822  | -0.159844 |
| 10            | 6             | 0           | -2.517619               | 0.592135  | 1.242121  |
| 11            | 6             | 0           | -1.795082               | 1.408084  | 2.152652  |
| 12            | 1             | 0           | -2.018363               | 1.329353  | 3.207852  |
| 13            | 6             | 0           | -0.816411               | 2.270761  | 1.7162    |
| 14            | 6             | 0           | -0.518204               | 2.405917  | 0.340098  |
| 15            | 6             | 0           | -1.230537               | 1.569939  | -0.57881  |
| 16            | 1             | 0           | -6.827601               | -3.380537 | 0.677072  |
| 17            | 1             | 0           | -5.637411               | -1.959549 | 2.261835  |
| 18            | 1             | 0           | -4.370096               | -1.906627 | -2.527558 |
| 19            | 1             | 0           | -6.199528               | -3.369707 | -1.728852 |
| 20            | 1             | 0           | -0.257559               | 2.847115  | 2.440612  |
| 21            | 1             | 0           | -0.979852               | 1.647033  | -1.627108 |
| 22            | 6             | 0           | 0.489504                | 3.278637  | -0.139218 |
| 23            | 8             | 0           | 2.110989                | 1.973253  | -0.466762 |
| 24            | 6             | 0           | 2.587137                | 1.39307   | 0.599868  |
| 25            | 8             | 0           | 2.387339                | 1.774386  | 1.750822  |
| 26            | 6             | 0           | 3.451084                | 0.176368  | 0.356348  |
| 27            | 6             | 0           | 3.511533                | -0.489599 | -0.875472 |
| 28            | 6             | 0           | 4.21206                 | -0.320618 | 1.414729  |
| 29            | 6             | 0           | 4.311165                | -1.609054 | -1.041524 |
| 30            | 1             | 0           | 2.915004                | -0.135588 | -1.706063 |
| 31            | 6             | 0           | 5.028724                | -1.438154 | 1.261859  |
| 32            | 1             | 0           | 4.147122                | 0.18684   | 2.36926   |



|                                              |   |   |           |              |           |
|----------------------------------------------|---|---|-----------|--------------|-----------|
| 33                                           | 6 | 0 | 5.081546  | -2.088831    | 0.025075  |
| 34                                           | 1 | 0 | 4.356497  | -2.136615    | -1.986889 |
| 35                                           | 1 | 0 | 5.609783  | -1.791136    | 2.103473  |
| 36                                           | 8 | 0 | 5.841172  | -3.190315    | -0.240756 |
| 37                                           | 6 | 0 | 6.63952   | -3.730234    | 0.801853  |
| 38                                           | 1 | 0 | 6.02696   | -4.062268    | 1.647684  |
| 39                                           | 1 | 0 | 7.151225  | -4.589184    | 0.370236  |
| 40                                           | 1 | 0 | 7.383173  | -3.007353    | 1.155873  |
| 41                                           | 1 | 0 | 0.507842  | 3.414898     | -1.214346 |
| 42                                           | 6 | 0 | 1.142417  | 4.3614       | 0.655911  |
| 43                                           | 1 | 0 | 2.041057  | 4.705281     | 0.14262   |
| 44                                           | 1 | 0 | 0.459479  | 5.217249     | 0.74793   |
| 45                                           | 1 | 0 | 1.431765  | 4.018109     | 1.646595  |
| 46                                           | 8 | 0 | -2.628216 | -0.299817    | -2.360839 |
| 47                                           | 8 | 0 | -3.769693 | -0.291506    | 3.018041  |
| 48                                           | 1 | 0 | -4.406436 | -0.980826    | 3.23468   |
| 49                                           | 1 | 0 | -1.82387  | 0.172308     | -2.703415 |
| 50                                           | 8 | 0 | -0.676343 | 0.795576     | -3.759621 |
| 51                                           | 1 | 0 | 0.25792   | 1.00648      | -3.516784 |
| 52                                           | 1 | 0 | -0.972419 | 1.544157     | -4.285959 |
| 53                                           | 8 | 0 | 1.751285  | 1.673644     | -3.057262 |
| 54                                           | 1 | 0 | 1.975525  | 1.747841     | -2.0915   |
| 55                                           | 1 | 0 | 2.585259  | 1.6156       | -3.5301   |
| <hr/>                                        |   |   |           |              |           |
| Sum of electronic and zero-point Energies=   |   |   |           | -1455.495777 |           |
| Sum of electronic and thermal Free Energies= |   |   |           | -1455.560278 |           |
| The imaginary frequency:                     |   |   |           | -139.51      |           |

The product complex of photodeprotection process of compound **1** via the triplet surface:

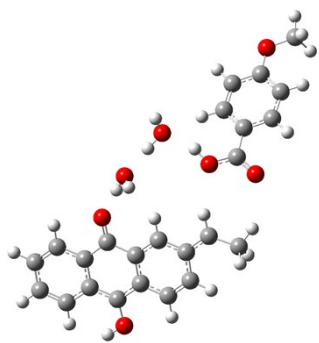

| Center Number | Atomic Number | Atomic Type | Coordinates (Angstroms) |           |           |
|---------------|---------------|-------------|-------------------------|-----------|-----------|
|               |               |             | X                       | Y         | Z         |
| 1             | 6             | 0           | 7.485302                | -2.074309 | -0.829894 |
| 2             | 6             | 0           | 7.082134                | -0.768003 | -0.983341 |
| 3             | 6             | 0           | 5.768102                | -0.359031 | -0.627538 |
| 4             | 6             | 0           | 4.869766                | -1.340239 | -0.101269 |
| 5             | 6             | 0           | 5.311214                | -2.666223 | 0.043595  |
| 6             | 6             | 0           | 6.593185                | -3.035702 | -0.312305 |
| 7             | 6             | 0           | 5.311656                | 0.973441  | -0.769612 |
| 8             | 6             | 0           | 3.502251                | -0.996501 | 0.295503  |
| 9             | 6             | 0           | 3.07606                 | 0.397876  | 0.118265  |
| 10            | 6             | 0           | 3.979452                | 1.360463  | -0.403111 |
| 11            | 6             | 0           | 3.541141                | 2.69824   | -0.555335 |
| 12            | 1             | 0           | 4.23007                 | 3.43286   | -0.950761 |
| 13            | 6             | 0           | 2.262625                | 3.063839  | -0.210572 |
| 14            | 6             | 0           | 1.327686                | 2.118058  | 0.308953  |
| 15            | 6             | 0           | 1.774851                | 0.789822  | 0.459802  |
| 16            | 1             | 0           | 8.491847                | -2.36407  | -1.108199 |
| 17            | 1             | 0           | 7.799581                | -0.057145 | -1.384327 |
| 18            | 1             | 0           | 4.60761                 | -3.384757 | 0.444515  |
| 19            | 1             | 0           | 6.91672                 | -4.063219 | -0.194877 |
| 20            | 1             | 0           | 1.956372                | 4.095217  | -0.337761 |
| 21            | 1             | 0           | 1.094155                | 0.044539  | 0.850582  |
| 22            | 6             | 0           | -0.002809               | 2.481734  | 0.661491  |
| 23            | 8             | 0           | -2.603917               | 0.362297  | 1.293093  |
| 24            | 6             | 0           | -3.671721               | 1.046754  | 0.853745  |
| 25            | 8             | 0           | -3.684544               | 2.255452  | 0.944193  |
| 26            | 6             | 0           | -4.816109               | 0.287058  | 0.258317  |
| 27            | 6             | 0           | -4.733204               | -1.04362  | -0.181144 |
| 28            | 6             | 0           | -6.021213               | 0.972688  | 0.085938  |
| 29            | 6             | 0           | -5.829415               | -1.664195 | -0.75738  |

|                                              |   |   |           |              |           |
|----------------------------------------------|---|---|-----------|--------------|-----------|
| 30                                           | 1 | 0 | -3.811433 | -1.60365     | -0.083736 |
| 31                                           | 6 | 0 | -7.130942 | 0.357232     | -0.481024 |
| 32                                           | 1 | 0 | -6.071892 | 2.006378     | 0.404189  |
| 33                                           | 6 | 0 | -7.038251 | -0.972754    | -0.907733 |
| 34                                           | 1 | 0 | -5.7747   | -2.687516    | -1.10824  |
| 35                                           | 1 | 0 | -8.0503   | 0.916516     | -0.590128 |
| 36                                           | 8 | 0 | -8.053805 | -1.673358    | -1.478867 |
| 37                                           | 6 | 0 | -9.304672 | -1.025441    | -1.672491 |
| 38                                           | 1 | 0 | -9.208128 | -0.157329    | -2.333368 |
| 39                                           | 1 | 0 | -9.951415 | -1.764929    | -2.141475 |
| 40                                           | 1 | 0 | -9.74531  | -0.711111    | -0.720141 |
| 41                                           | 1 | 0 | -0.649784 | 1.701325     | 1.046086  |
| 42                                           | 6 | 0 | -0.583761 | 3.849973     | 0.538807  |
| 43                                           | 1 | 0 | -0.130659 | 4.552807     | 1.253724  |
| 44                                           | 1 | 0 | -0.428232 | 4.280506     | -0.458706 |
| 45                                           | 1 | 0 | -1.655674 | 3.814188     | 0.733625  |
| 46                                           | 8 | 0 | 2.746388  | -1.871508    | 0.765194  |
| 47                                           | 8 | 0 | 6.093694  | 1.96033      | -1.258272 |
| 48                                           | 1 | 0 | 6.961276  | 1.614746     | -1.493377 |
| 49                                           | 1 | 0 | 1.210487  | -2.088975    | 1.575066  |
| 50                                           | 8 | 0 | 0.393314  | -2.139597    | 2.116754  |
| 51                                           | 1 | 0 | -1.220936 | -2.263615    | 1.545192  |
| 52                                           | 1 | 0 | 0.539188  | -1.528378    | 2.844424  |
| 53                                           | 8 | 0 | -2.188805 | -2.270799    | 1.35688   |
| 54                                           | 1 | 0 | -2.669004 | -0.623673    | 1.288077  |
| 55                                           | 1 | 0 | -2.578401 | -2.850228    | 2.017814  |
| -----                                        |   |   |           |              |           |
| Sum of electronic and zero-point Energies=   |   |   |           | -1455.531513 |           |
| Sum of electronic and thermal Free Energies= |   |   |           | -1455.600636 |           |

The reaction complex of water-assisted photodeprotection process of compound **1** via the ground surface:

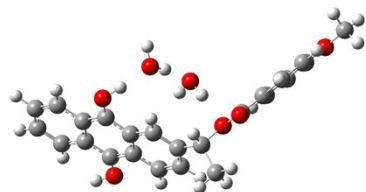

| Center Number | Atomic Number | Atomic Type | Coordinates (Angstroms) |           |           |
|---------------|---------------|-------------|-------------------------|-----------|-----------|
|               |               |             | X                       | Y         | Z         |
| 1             | 6             | 0           | -7.113078               | -1.477913 | 0.797148  |
| 2             | 6             | 0           | -6.275889               | -0.592766 | 1.419129  |
| 3             | 6             | 0           | -5.016229               | -0.232634 | 0.849215  |
| 4             | 6             | 0           | -4.636636               | -0.850677 | -0.397272 |
| 5             | 6             | 0           | -5.534995               | -1.773387 | -1.009376 |
| 6             | 6             | 0           | -6.740025               | -2.074446 | -0.436881 |
| 7             | 6             | 0           | -4.131797               | 0.670229  | 1.466579  |
| 8             | 6             | 0           | -3.392913               | -0.552052 | -0.988472 |
| 9             | 6             | 0           | -2.535199               | 0.388151  | -0.382645 |
| 10            | 6             | 0           | -2.898358               | 0.982156  | 0.879348  |
| 11            | 6             | 0           | -1.977298               | 1.882829  | 1.496394  |
| 12            | 1             | 0           | -2.243959               | 2.30875   | 2.454689  |
| 13            | 6             | 0           | -0.791838               | 2.204448  | 0.897974  |
| 14            | 6             | 0           | -0.451098               | 1.674709  | -0.38476  |
| 15            | 6             | 0           | -1.312803               | 0.798242  | -0.993432 |
| 16            | 1             | 0           | -8.062886               | -1.734654 | 1.252517  |
| 17            | 1             | 0           | -6.579766               | -0.180582 | 2.376618  |
| 18            | 1             | 0           | -5.230303               | -2.225756 | -1.943612 |
| 19            | 1             | 0           | -7.412412               | -2.775791 | -0.917535 |
| 20            | 1             | 0           | -0.110462               | 2.88335   | 1.396529  |
| 21            | 1             | 0           | -1.058745               | 0.392532  | -1.964611 |
| 22            | 6             | 0           | 0.842655                | 2.041454  | -1.071341 |
| 23            | 8             | 0           | 1.903252                | 1.240372  | -0.414276 |
| 24            | 6             | 0           | 3.06578                 | 1.071868  | -1.112008 |
| 25            | 8             | 0           | 3.217024                | 1.476469  | -2.240821 |
| 26            | 6             | 0           | 4.095115                | 0.338264  | -0.33631  |
| 27            | 6             | 0           | 3.934296                | -0.018848 | 1.012055  |
| 28            | 6             | 0           | 5.287418                | 0.006532  | -0.984471 |
| 29            | 6             | 0           | 4.937273                | -0.692163 | 1.684047  |
| 30            | 1             | 0           | 3.020835                | 0.238262  | 1.53104   |

|                                              |   |   |           |              |           |
|----------------------------------------------|---|---|-----------|--------------|-----------|
| 31                                           | 6 | 0 | 6.301296  | -0.672379    | -0.320358 |
| 32                                           | 1 | 0 | 5.407934  | 0.290521     | -2.022529 |
| 33                                           | 6 | 0 | 6.129013  | -1.026843    | 1.023716  |
| 34                                           | 1 | 0 | 4.82863   | -0.974953    | 2.723655  |
| 35                                           | 1 | 0 | 7.21143   | -0.91763     | -0.850022 |
| 36                                           | 8 | 0 | 7.048415  | -1.688104    | 1.769278  |
| 37                                           | 6 | 0 | 8.282715  | -2.061416    | 1.165624  |
| 38                                           | 1 | 0 | 8.842782  | -1.183764    | 0.82643   |
| 39                                           | 1 | 0 | 8.848114  | -2.571796    | 1.942951  |
| 40                                           | 1 | 0 | 8.125238  | -2.743938    | 0.323994  |
| 41                                           | 1 | 0 | 0.810712  | 1.712927     | -2.110342 |
| 42                                           | 6 | 0 | 1.208988  | 3.520014     | -1.01497  |
| 43                                           | 1 | 0 | 2.113502  | 3.706564     | -1.593325 |
| 44                                           | 1 | 0 | 0.395257  | 4.11126      | -1.441791 |
| 45                                           | 1 | 0 | 1.372242  | 3.851888     | 0.01233   |
| 46                                           | 8 | 0 | -3.082573 | -1.167505    | -2.157533 |
| 47                                           | 8 | 0 | -4.415173 | 1.2725       | 2.667987  |
| 48                                           | 1 | 0 | -5.358942 | 1.21313      | 2.840224  |
| 49                                           | 1 | 0 | -2.131587 | -1.426595    | -2.187561 |
| 50                                           | 8 | 0 | -0.504568 | -2.004469    | -2.222451 |
| 51                                           | 1 | 0 | -0.030185 | -1.916709    | -1.367275 |
| 52                                           | 1 | 0 | -0.35559  | -2.9036      | -2.52784  |
| 53                                           | 8 | 0 | 0.691722  | -1.458737    | 0.206357  |
| 54                                           | 1 | 0 | 1.131393  | -0.607311    | 0.053768  |
| 55                                           | 1 | 0 | -0.056369 | -1.230564    | 0.769765  |
| -----                                        |   |   |           |              |           |
| Sum of electronic and zero-point Energies=   |   |   |           | -1455.567869 |           |
| Sum of electronic and thermal Free Energies= |   |   |           | -1455.631491 |           |

The transition state of water-assisted photodeprotection process of compound **1** via the ground surface:

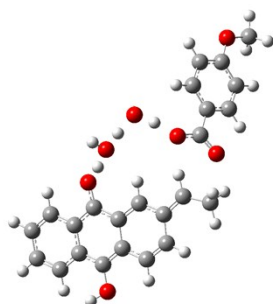

| Center Number | Atomic Number | Atomic Type | Coordinates (Angstroms) |           |           |
|---------------|---------------|-------------|-------------------------|-----------|-----------|
|               |               |             | X                       | Y         | Z         |
| 1             | 6             | 0           | -6.642658               | -2.565477 | 1.183883  |
| 2             | 6             | 0           | -6.398169               | -1.211971 | 1.285484  |
| 3             | 6             | 0           | -5.228097               | -0.639174 | 0.733142  |
| 4             | 6             | 0           | -4.28669                | -1.50629  | 0.103118  |
| 5             | 6             | 0           | -4.567575               | -2.886575 | 0.006478  |
| 6             | 6             | 0           | -5.727816               | -3.412324 | 0.531238  |
| 7             | 6             | 0           | -4.969983               | 0.767057  | 0.798875  |
| 8             | 6             | 0           | -3.048559               | -0.985553 | -0.426036 |
| 9             | 6             | 0           | -2.77399                | 0.423038  | -0.246665 |
| 10            | 6             | 0           | -3.784544               | 1.294338  | 0.342637  |
| 11            | 6             | 0           | -3.491491               | 2.702819  | 0.451458  |
| 12            | 1             | 0           | -4.263911               | 3.341515  | 0.858575  |
| 13            | 6             | 0           | -2.295991               | 3.212635  | 0.081513  |
| 14            | 6             | 0           | -1.25321                | 2.354259  | -0.446782 |
| 15            | 6             | 0           | -1.551697               | 0.969554  | -0.601683 |
| 16            | 1             | 0           | -7.543955               | -2.980712 | 1.620676  |
| 17            | 1             | 0           | -7.098806               | -0.589147 | 1.82913   |
| 18            | 1             | 0           | -3.839217               | -3.51858  | -0.483712 |
| 19            | 1             | 0           | -5.930777               | -4.473715 | 0.454807  |
| 20            | 1             | 0           | -2.106474               | 4.273061  | 0.184932  |
| 21            | 1             | 0           | -0.770521               | 0.343577  | -1.010024 |
| 22            | 6             | 0           | 0.01518                 | 2.769526  | -0.803924 |
| 23            | 8             | 0           | 2.244339                | 0.604071  | -1.190154 |
| 24            | 6             | 0           | 3.038655                | 1.088945  | -0.292559 |
| 25            | 8             | 0           | 2.821437                | 2.135247  | 0.327545  |
| 26            | 6             | 0           | 4.311529                | 0.322588  | 0.000674  |
| 27            | 6             | 0           | 4.783184                | -0.707252 | -0.825916 |
| 28            | 6             | 0           | 5.070397                | 0.670974  | 1.118012  |

|                                              |   |   |           |              |           |
|----------------------------------------------|---|---|-----------|--------------|-----------|
| 29                                           | 6 | 0 | 5.964136  | -1.372715    | -0.533209 |
| 30                                           | 1 | 0 | 4.2222    | -0.983718    | -1.709806 |
| 31                                           | 6 | 0 | 6.254106  | 0.007296     | 1.431377  |
| 32                                           | 1 | 0 | 4.712995  | 1.482895     | 1.739356  |
| 33                                           | 6 | 0 | 6.706571  | -1.023231    | 0.601229  |
| 34                                           | 1 | 0 | 6.340389  | -2.164158    | -1.170744 |
| 35                                           | 1 | 0 | 6.811609  | 0.301787     | 2.310744  |
| 36                                           | 8 | 0 | 7.850662  | -1.739773    | 0.807271  |
| 37                                           | 6 | 0 | 8.654955  | -1.418371    | 1.931564  |
| 38                                           | 1 | 0 | 8.111407  | -1.564546    | 2.872023  |
| 39                                           | 1 | 0 | 9.50209   | -2.102008    | 1.897039  |
| 40                                           | 1 | 0 | 9.021385  | -0.386646    | 1.883639  |
| 41                                           | 1 | 0 | 0.712922  | 2.009692     | -1.159304 |
| 42                                           | 6 | 0 | 0.576644  | 4.130028     | -0.703507 |
| 43                                           | 1 | 0 | 1.482729  | 4.043622     | -0.090723 |
| 44                                           | 1 | 0 | 0.929731  | 4.451339     | -1.6921   |
| 45                                           | 1 | 0 | -0.097857 | 4.88341      | -0.298514 |
| 46                                           | 8 | 0 | -2.253255 | -1.819131    | -1.000203 |
| 47                                           | 8 | 0 | -5.884402 | 1.615345     | 1.377632  |
| 48                                           | 1 | 0 | -6.774934 | 1.310605     | 1.176     |
| 49                                           | 1 | 0 | -1.4119   | -1.538685    | -1.74711  |
| 50                                           | 8 | 0 | -0.533801 | -1.33902     | -2.592233 |
| 51                                           | 1 | 0 | 0.500232  | -1.54676     | -2.287921 |
| 52                                           | 1 | 0 | -0.718909 | -1.732366    | -3.4493   |
| 53                                           | 8 | 0 | 1.768352  | -1.67905     | -1.895931 |
| 54                                           | 1 | 0 | 2.075028  | -0.698966    | -1.55887  |
| 55                                           | 1 | 0 | 1.898556  | -2.287764    | -1.162633 |
| -----                                        |   |   |           |              |           |
| Sum of electronic and zero-point Energies=   |   |   |           | -1455.532988 |           |
| Sum of electronic and thermal Free Energies= |   |   |           | -1455.597421 |           |
| The imaginary frequency:                     |   |   |           | -752.61      |           |

The product complex of water-assisted photodeprotection process of compound **1** via the ground surface:

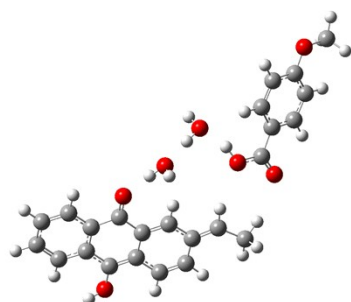

| Center Number | Atomic Number | Atomic Type | Coordinates (Angstroms) |           |           |
|---------------|---------------|-------------|-------------------------|-----------|-----------|
|               |               |             | X                       | Y         | Z         |
| 1             | 6             | 0           | -7.518327               | -2.100567 | 0.913538  |
| 2             | 6             | 0           | -7.121187               | -0.774788 | 0.973083  |
| 3             | 6             | 0           | -5.837438               | -0.381761 | 0.541905  |
| 4             | 6             | 0           | -4.947457               | -1.389094 | 0.084811  |
| 5             | 6             | 0           | -5.36897                | -2.723998 | 0.033237  |
| 6             | 6             | 0           | -6.645142               | -3.08408  | 0.433776  |
| 7             | 6             | 0           | -5.41299                | 0.999769  | 0.566362  |
| 8             | 6             | 0           | -3.568248               | -1.055063 | -0.316016 |
| 9             | 6             | 0           | -3.176929               | 0.364693  | -0.213729 |
| 10            | 6             | 0           | -4.141268               | 1.369397  | 0.215054  |
| 11            | 6             | 0           | -3.700989               | 2.746115  | 0.25391   |
| 12            | 1             | 0           | -4.421731               | 3.492989  | 0.560236  |
| 13            | 6             | 0           | -2.439031               | 3.101406  | -0.071548 |
| 14            | 6             | 0           | -1.456364               | 2.112361  | -0.486232 |
| 15            | 6             | 0           | -1.905937               | 0.74546   | -0.545114 |
| 16            | 1             | 0           | -8.510696               | -2.3763   | 1.252606  |
| 17            | 1             | 0           | -7.803242               | -0.042904 | 1.390635  |
| 18            | 1             | 0           | -4.660508               | -3.461262 | -0.323257 |
| 19            | 1             | 0           | -6.961434               | -4.119445 | 0.389332  |
| 20            | 1             | 0           | -2.149304               | 4.14373   | -0.028769 |
| 21            | 1             | 0           | -1.200031               | -0.008799 | -0.874945 |
| 22            | 6             | 0           | -0.157781               | 2.389653  | -0.819804 |
| 23            | 8             | 0           | 2.534992                | 0.431346  | -0.632516 |
| 24            | 6             | 0           | 3.628112                | 1.109427  | -0.249851 |
| 25            | 8             | 0           | 3.571115                | 2.314368  | -0.123874 |
| 26            | 6             | 0           | 4.893352                | 0.349096  | -0.006242 |
| 27            | 6             | 0           | 5.102913                | -0.977778 | -0.41443  |
| 28            | 6             | 0           | 5.942578                | 1.028877  | 0.618017  |



|    |   |   |           |           |           |
|----|---|---|-----------|-----------|-----------|
| 29 | 6 | 0 | 6.319087  | -1.600345 | -0.187447 |
| 30 | 1 | 0 | 4.319125  | -1.536084 | -0.91068  |
| 31 | 6 | 0 | 7.164679  | 0.412367  | 0.857964  |
| 32 | 1 | 0 | 5.782451  | 2.058907  | 0.910784  |
| 33 | 6 | 0 | 7.358959  | -0.913446 | 0.452499  |
| 34 | 1 | 0 | 6.494632  | -2.621455 | -0.503231 |
| 35 | 1 | 0 | 7.951634  | 0.967111  | 1.350549  |
| 36 | 8 | 0 | 8.509723  | -1.614123 | 0.629547  |
| 37 | 6 | 0 | 9.612371  | -0.969075 | 1.255108  |
| 38 | 1 | 0 | 9.369193  | -0.660204 | 2.277428  |
| 39 | 1 | 0 | 10.41048  | -1.708786 | 1.282957  |
| 40 | 1 | 0 | 9.945199  | -0.098214 | 0.680322  |
| 41 | 1 | 0 | 0.474277  | 1.55287   | -1.102296 |
| 42 | 6 | 0 | 0.524496  | 3.709824  | -0.818694 |
| 43 | 1 | 0 | 1.503411  | 3.607021  | -0.338913 |
| 44 | 1 | 0 | 0.737257  | 4.018124  | -1.851783 |
| 45 | 1 | 0 | -0.046938 | 4.504531  | -0.338555 |
| 46 | 8 | 0 | -2.798386 | -1.945744 | -0.706166 |
| 47 | 8 | 0 | -6.286911 | 1.972118  | 0.991786  |
| 48 | 1 | 0 | -7.179683 | 1.738137  | 0.718042  |
| 49 | 1 | 0 | -1.190741 | -2.177231 | -1.32228  |
| 50 | 8 | 0 | -0.311548 | -2.267543 | -1.749532 |
| 51 | 1 | 0 | 1.250296  | -2.267019 | -1.038055 |
| 52 | 1 | 0 | -0.454815 | -2.097446 | -2.684163 |
| 53 | 8 | 0 | 2.134422  | -2.202016 | -0.609071 |
| 54 | 1 | 0 | 2.565947  | -0.553807 | -0.544284 |
| 55 | 1 | 0 | 2.057037  | -2.672388 | 0.225986  |

---

Sum of electronic and zero-point Energies= -1455.559198

Sum of electronic and thermal Free Energies= -1455.627062

The reaction complex of methanol-assisted photodeprotection process of compound **1** via the triplet surface:

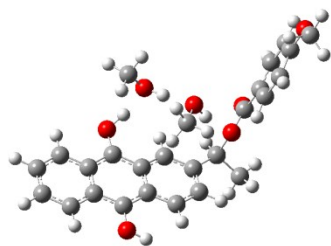

| Center Number | Atomic Number | Atomic Type | Coordinates (Angstroms) |           |           |
|---------------|---------------|-------------|-------------------------|-----------|-----------|
|               |               |             | X                       | Y         | Z         |
| 1             | 6             | 0           | 6.972853                | -1.462598 | 0.622075  |
| 2             | 6             | 0           | 6.174882                | -0.506578 | 1.278744  |
| 3             | 6             | 0           | 4.930333                | -0.135721 | 0.757651  |
| 4             | 6             | 0           | 4.471097                | -0.738262 | -0.458191 |
| 5             | 6             | 0           | 5.276248                | -1.694679 | -1.089849 |
| 6             | 6             | 0           | 6.525347                | -2.052612 | -0.551208 |
| 7             | 6             | 0           | 4.082249                | 0.825743  | 1.410121  |
| 8             | 6             | 0           | 3.187976                | -0.357142 | -0.981894 |
| 9             | 6             | 0           | 2.377757                | 0.65654   | -0.362846 |
| 10            | 6             | 0           | 2.805224                | 1.214994  | 0.893699  |
| 11            | 6             | 0           | 1.956283                | 2.122852  | 1.544265  |
| 12            | 1             | 0           | 2.213283                | 2.522793  | 2.520328  |
| 13            | 6             | 0           | 0.745122                | 2.538882  | 0.95943   |
| 14            | 6             | 0           | 0.365497                | 2.065931  | -0.287193 |
| 15            | 6             | 0           | 1.189636                | 1.115633  | -0.938663 |
| 16            | 1             | 0           | 7.935777                | -1.735454 | 1.043031  |
| 17            | 1             | 0           | 6.521356                | -0.053813 | 2.200415  |
| 18            | 1             | 0           | 4.923601                | -2.157586 | -2.004061 |
| 19            | 1             | 0           | 7.13442                 | -2.793881 | -1.05997  |
| 20            | 1             | 0           | 0.890177                | 0.744521  | -1.912276 |
| 21            | 8             | 0           | 2.773306                | -0.974677 | -2.110168 |
| 22            | 8             | 0           | 4.581332                | 1.356023  | 2.556485  |
| 23            | 1             | 0           | 4.041239                | 2.100585  | 2.861526  |
| 24            | 1             | 0           | 0.120506                | 3.244442  | 1.496178  |
| 25            | 8             | 0           | -1.969783               | 1.590648  | -0.427684 |
| 26            | 6             | 0           | -3.051122               | 1.364962  | -1.21391  |
| 27            | 8             | 0           | -3.151652               | 1.816302  | -2.347021 |
| 28            | 6             | 0           | -4.06521                | 0.517402  | -0.559306 |
| 29            | 6             | 0           | -5.149281               | 0.055677  | -1.326772 |

|    |   |   |           |           |           |
|----|---|---|-----------|-----------|-----------|
| 30 | 6 | 0 | -3.989531 | 0.164056  | 0.794861  |
| 31 | 6 | 0 | -6.121705 | -0.747081 | -0.758571 |
| 32 | 1 | 0 | -5.212291 | 0.330521  | -2.373978 |
| 33 | 6 | 0 | -4.964206 | -0.637886 | 1.379047  |
| 34 | 1 | 0 | -3.169245 | 0.525992  | 1.402886  |
| 35 | 6 | 0 | -6.034627 | -1.100708 | 0.599599  |
| 36 | 1 | 0 | -6.959433 | -1.115299 | -1.341417 |
| 37 | 1 | 0 | -4.886207 | -0.892724 | 2.428037  |
| 38 | 8 | 0 | -7.034282 | -1.889692 | 1.066198  |
| 39 | 6 | 0 | -7.000037 | -2.290467 | 2.440916  |
| 40 | 1 | 0 | -7.883606 | -2.912242 | 2.58831   |
| 41 | 1 | 0 | -6.099813 | -2.874687 | 2.658709  |
| 42 | 1 | 0 | -7.047717 | -1.422162 | 3.106355  |
| 43 | 1 | 0 | 1.792993  | -1.210892 | -2.056442 |
| 44 | 6 | 0 | 0.762412  | -3.268168 | -1.396002 |
| 45 | 1 | 0 | 1.260819  | -3.783612 | -2.220842 |
| 46 | 1 | 0 | 1.451289  | -3.222758 | -0.543171 |
| 47 | 1 | 0 | -0.125766 | -3.840946 | -1.106197 |
| 48 | 8 | 0 | 0.39573   | -1.960939 | -1.852639 |
| 49 | 1 | 0 | -0.132276 | -1.543767 | -1.123502 |
| 50 | 6 | 0 | -0.273245 | -1.141058 | 1.439793  |
| 51 | 1 | 0 | -0.144232 | -2.201736 | 1.66761   |
| 52 | 1 | 0 | -0.804986 | -0.665437 | 2.271735  |
| 53 | 1 | 0 | 0.711952  | -0.676554 | 1.333545  |
| 54 | 8 | 0 | -1.035309 | -1.05674  | 0.230507  |
| 55 | 1 | 0 | -1.237911 | -0.118499 | 0.06473   |
| 56 | 6 | 0 | -0.916845 | 2.489796  | -0.954858 |
| 57 | 1 | 0 | -0.851    | 2.292292  | -2.026046 |
| 58 | 6 | 0 | -1.348954 | 3.925776  | -0.712182 |
| 59 | 1 | 0 | -2.265609 | 4.141266  | -1.266418 |
| 60 | 1 | 0 | -1.533591 | 4.111223  | 0.349098  |
| 61 | 1 | 0 | -0.567372 | 4.609322  | -1.056137 |

---

Sum of electronic and zero-point Energies= -1533.874635

Sum of electronic and thermal Free Energies= -1533.942339

The transition state of methanol-assisted photodeprotection process of compound **1** via the triplet surface:

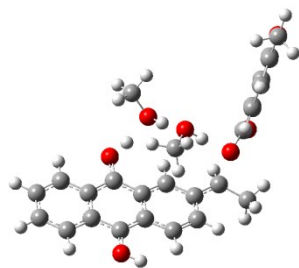

| Center Number | Atomic Number | Atomic Type | Coordinates (Angstroms) |           |           |
|---------------|---------------|-------------|-------------------------|-----------|-----------|
|               |               |             | X                       | Y         | Z         |
| 1             | 6             | 0           | 6.782929                | -1.908066 | 0.649623  |
| 2             | 6             | 0           | 6.129727                | -0.820435 | 1.236026  |
| 3             | 6             | 0           | 4.919828                | -0.349822 | 0.71228   |
| 4             | 6             | 0           | 4.345067                | -0.985019 | -0.429739 |
| 5             | 6             | 0           | 5.014378                | -2.085808 | -0.997979 |
| 6             | 6             | 0           | 6.220804                | -2.536397 | -0.464119 |
| 7             | 6             | 0           | 4.215033                | 0.760135  | 1.309414  |
| 8             | 6             | 0           | 3.098774                | -0.510232 | -0.951117 |
| 9             | 6             | 0           | 2.442035                | 0.648959  | -0.403486 |
| 10            | 6             | 0           | 3.001647                | 1.257951  | 0.779475  |
| 11            | 6             | 0           | 2.311146                | 2.35545   | 1.358416  |
| 12            | 1             | 0           | 2.680749                | 2.831296  | 2.260301  |
| 13            | 6             | 0           | 1.147481                | 2.852184  | 0.800228  |
| 14            | 6             | 0           | 0.615048                | 2.311358  | -0.386797 |
| 15            | 6             | 0           | 1.296555                | 1.19659   | -0.975117 |
| 16            | 1             | 0           | 7.721243                | -2.261728 | 1.064225  |
| 17            | 1             | 0           | 6.55637                 | -0.335018 | 2.105976  |
| 18            | 1             | 0           | 4.578567                | -2.579523 | -1.858316 |
| 19            | 1             | 0           | 6.723009                | -3.384344 | -0.920089 |
| 20            | 1             | 0           | 0.897753                | 0.778659  | -1.891089 |
| 21            | 8             | 0           | 2.586708                | -1.1663   | -2.003441 |
| 22            | 8             | 0           | 4.80803                 | 1.284238  | 2.394723  |
| 23            | 1             | 0           | 4.318626                | 2.04041   | 2.754121  |
| 24            | 1             | 0           | 0.651521                | 3.684333  | 1.287383  |
| 25            | 8             | 0           | -1.964278               | 1.631398  | -0.241342 |
| 26            | 6             | 0           | -3.017427               | 1.440951  | -0.996076 |
| 27            | 8             | 0           | -3.179716               | 1.951866  | -2.115587 |
| 28            | 6             | 0           | -4.052965               | 0.530962  | -0.411647 |

|    |   |   |           |           |           |
|----|---|---|-----------|-----------|-----------|
| 29 | 6 | 0 | -5.105963 | 0.07458   | -1.221083 |
| 30 | 6 | 0 | -4.007217 | 0.12269   | 0.926219  |
| 31 | 6 | 0 | -6.074196 | -0.775632 | -0.71182  |
| 32 | 1 | 0 | -5.150537 | 0.391717  | -2.257301 |
| 33 | 6 | 0 | -4.977758 | -0.724912 | 1.455813  |
| 34 | 1 | 0 | -3.207453 | 0.477143  | 1.566265  |
| 35 | 6 | 0 | -6.015197 | -1.181498 | 0.631738  |
| 36 | 1 | 0 | -6.886857 | -1.139944 | -1.332165 |
| 37 | 1 | 0 | -4.919779 | -1.019197 | 2.496125  |
| 38 | 8 | 0 | -7.010074 | -2.015576 | 1.040681  |
| 39 | 6 | 0 | -7.000926 | -2.462961 | 2.399528  |
| 40 | 1 | 0 | -7.871205 | -3.112164 | 2.503184  |
| 41 | 1 | 0 | -6.092042 | -3.031986 | 2.623264  |
| 42 | 1 | 0 | -7.08848  | -1.621027 | 3.094792  |
| 43 | 1 | 0 | 1.569356  | -1.212998 | -1.989876 |
| 44 | 6 | 0 | 0.003168  | -3.02706  | -1.87341  |
| 45 | 1 | 0 | 0.219042  | -3.437684 | -2.863195 |
| 46 | 1 | 0 | 0.738135  | -3.421541 | -1.160496 |
| 47 | 1 | 0 | -0.9978   | -3.349378 | -1.566864 |
| 48 | 8 | 0 | 0.065859  | -1.598269 | -1.961405 |
| 49 | 1 | 0 | -0.307242 | -1.243047 | -1.105337 |
| 50 | 6 | 0 | -0.070225 | -0.869933 | 1.448438  |
| 51 | 1 | 0 | 0.738384  | -1.571632 | 1.224189  |
| 52 | 1 | 0 | -0.593761 | -1.215357 | 2.348879  |
| 53 | 1 | 0 | 0.364669  | 0.11294   | 1.648543  |
| 54 | 8 | 0 | -0.966597 | -0.830257 | 0.334797  |
| 55 | 1 | 0 | -1.293027 | 0.091364  | 0.215172  |
| 56 | 6 | 0 | -0.588793 | 2.809232  | -0.97599  |
| 57 | 1 | 0 | -0.773885 | 2.484654  | -1.994604 |
| 58 | 6 | 0 | -1.183707 | 4.133498  | -0.614574 |
| 59 | 1 | 0 | -2.16991  | 4.240588  | -1.069282 |
| 60 | 1 | 0 | -1.276995 | 4.269246  | 0.465409  |
| 61 | 1 | 0 | -0.543387 | 4.9368    | -1.002098 |

---

Sum of electronic and zero-point Energies= -1533.860122

Sum of electronic and thermal Free Energies= -1533.929323

The imaginary frequency: -343.71

The product complex of methanol-assisted photodeprotection process of compound **1** via the triplet surface:

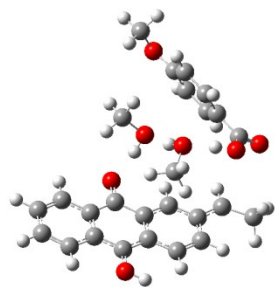

| Center Number | Atomic Number | Atomic Type | Coordinates (Angstroms) |           |           |
|---------------|---------------|-------------|-------------------------|-----------|-----------|
|               |               |             | X                       | Y         | Z         |
| 1             | 6             | 0           | 5.683286                | -2.732849 | 0.256283  |
| 2             | 6             | 0           | 5.53073                 | -1.381904 | 0.491325  |
| 3             | 6             | 0           | 4.352427                | -0.709258 | 0.076153  |
| 4             | 6             | 0           | 3.327429                | -1.445396 | -0.593265 |
| 5             | 6             | 0           | 3.512536                | -2.82388  | -0.816984 |
| 6             | 6             | 0           | 4.667915                | -3.460556 | -0.401383 |
| 7             | 6             | 0           | 4.167364                | 0.676976  | 0.317938  |
| 8             | 6             | 0           | 2.104038                | -0.79798  | -1.033658 |
| 9             | 6             | 0           | 1.94744                 | 0.627157  | -0.766186 |
| 10            | 6             | 0           | 2.966032                | 1.354294  | -0.084964 |
| 11            | 6             | 0           | 2.745905                | 2.727923  | 0.190485  |
| 12            | 1             | 0           | 3.488745                | 3.316585  | 0.721107  |
| 13            | 6             | 0           | 1.583804                | 3.3549    | -0.194986 |
| 14            | 6             | 0           | 0.556783                | 2.652572  | -0.898259 |
| 15            | 6             | 0           | 0.774283                | 1.28788   | -1.166476 |
| 16            | 1             | 0           | 6.587506                | -3.239018 | 0.579262  |
| 17            | 1             | 0           | 6.308244                | -0.822111 | 0.997794  |
| 18            | 1             | 0           | 2.725817                | -3.371519 | -1.323533 |
| 19            | 1             | 0           | 4.796104                | -4.523522 | -0.580631 |
| 20            | 1             | 0           | 0.015413                | 0.725695  | -1.698513 |
| 21            | 8             | 0           | 1.190891                | -1.458709 | -1.618995 |
| 22            | 8             | 0           | 5.170356                | 1.308759  | 0.94426   |
| 23            | 1             | 0           | 4.998356                | 2.257222  | 1.046801  |
| 24            | 1             | 0           | 1.449523                | 4.40459   | 0.041094  |
| 25            | 8             | 0           | -2.340891               | 2.353595  | 1.43442   |
| 26            | 6             | 0           | -3.240367               | 2.140217  | 0.471939  |
| 27            | 8             | 0           | -3.710389               | 3.086869  | -0.154192 |
| 28            | 6             | 0           | -3.641011               | 0.734071  | 0.207133  |

|    |   |   |           |           |           |
|----|---|---|-----------|-----------|-----------|
| 29 | 6 | 0 | -3.907379 | 0.334324  | -1.112212 |
| 30 | 6 | 0 | -3.781824 | -0.197062 | 1.242238  |
| 31 | 6 | 0 | -4.246021 | -0.979057 | -1.39264  |
| 32 | 1 | 0 | -3.820917 | 1.057384  | -1.916725 |
| 33 | 6 | 0 | -4.162289 | -1.510136 | 0.978256  |
| 34 | 1 | 0 | -3.599418 | 0.104029  | 2.267768  |
| 35 | 6 | 0 | -4.36531  | -1.911251 | -0.348554 |
| 36 | 1 | 0 | -4.419547 | -1.310385 | -2.411221 |
| 37 | 1 | 0 | -4.277609 | -2.207845 | 1.79765   |
| 38 | 8 | 0 | -4.681033 | -3.179663 | -0.72429  |
| 39 | 6 | 0 | -4.784457 | -4.179029 | 0.294379  |
| 40 | 1 | 0 | -5.015634 | -5.108997 | -0.226426 |
| 41 | 1 | 0 | -3.840053 | -4.289136 | 0.8377    |
| 42 | 1 | 0 | -5.59041  | -3.945359 | 0.998251  |
| 43 | 1 | 0 | -0.274426 | -1.339726 | -0.769248 |
| 44 | 6 | 0 | -0.869335 | -2.67681  | 0.53398   |
| 45 | 1 | 0 | -1.274501 | -3.468691 | -0.108578 |
| 46 | 1 | 0 | 0.17532   | -2.913188 | 0.769378  |
| 47 | 1 | 0 | -1.440245 | -2.65121  | 1.464488  |
| 48 | 8 | 0 | -0.988771 | -1.396674 | -0.090023 |
| 49 | 1 | 0 | -0.886246 | -0.266999 | 1.13414   |
| 50 | 6 | 0 | 0.420146  | 0.608976  | 2.358172  |
| 51 | 1 | 0 | 1.109764  | -0.212509 | 2.139605  |
| 52 | 1 | 0 | 0.426932  | 0.795294  | 3.436231  |
| 53 | 1 | 0 | 0.763789  | 1.511928  | 1.844054  |
| 54 | 8 | 0 | -0.91481  | 0.262098  | 1.977219  |
| 55 | 1 | 0 | -1.826957 | 1.510214  | 1.680306  |
| 56 | 6 | 0 | -0.644367 | 3.294849  | -1.308841 |
| 57 | 1 | 0 | -1.373357 | 2.683624  | -1.832461 |
| 58 | 6 | 0 | -0.98976  | 4.713383  | -1.01121  |
| 59 | 1 | 0 | -1.876036 | 5.02439   | -1.568522 |
| 60 | 1 | 0 | -1.210412 | 4.853772  | 0.057532  |
| 61 | 1 | 0 | -0.170558 | 5.401176  | -1.256451 |

---

Sum of electronic and zero-point Energies= -1533.892019

Sum of electronic and thermal Free Energies= -1533.960109

The reaction complex for ketyl formation in HAT process between IPA and para position of the compound **1** via the triplet surface:

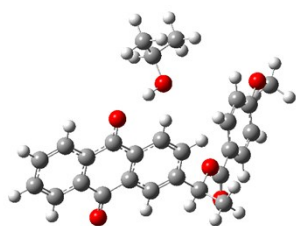

| Center Number | Atomic Number | Atomic Type | Coordinates (Angstroms) |           |           |
|---------------|---------------|-------------|-------------------------|-----------|-----------|
|               |               |             | X                       | Y         | Z         |
| 1             | 6             | 0           | -6.934366               | -0.837072 | -1.522483 |
| 2             | 6             | 0           | -5.9555                 | -0.015213 | -1.00439  |
| 3             | 6             | 0           | -4.702402               | -0.553294 | -0.624961 |
| 4             | 6             | 0           | -4.462271               | -1.937597 | -0.78512  |
| 5             | 6             | 0           | -5.476581               | -2.749565 | -1.314733 |
| 6             | 6             | 0           | -6.69839                | -2.214265 | -1.680083 |
| 7             | 6             | 0           | -3.666369               | 0.292289  | -0.079533 |
| 8             | 6             | 0           | -3.172448               | -2.553517 | -0.415523 |
| 9             | 6             | 0           | -2.15325                | -1.642523 | 0.139846  |
| 10            | 6             | 0           | -2.390566               | -0.257755 | 0.306415  |
| 11            | 6             | 0           | -1.367248               | 0.561622  | 0.84387   |
| 12            | 1             | 0           | -1.543903               | 1.622857  | 0.974683  |
| 13            | 6             | 0           | -0.160834               | 0.006488  | 1.209532  |
| 14            | 6             | 0           | 0.087709                | -1.374042 | 1.050066  |
| 15            | 6             | 0           | -0.910232               | -2.17224  | 0.516323  |
| 16            | 1             | 0           | -7.891294               | -0.415858 | -1.809471 |
| 17            | 1             | 0           | -6.133399               | 1.046729  | -0.883544 |
| 18            | 1             | 0           | -5.25919                | -3.80534  | -1.424608 |
| 19            | 1             | 0           | -7.472446               | -2.853818 | -2.087734 |
| 20            | 1             | 0           | 0.614901                | 0.642904  | 1.618721  |
| 21            | 1             | 0           | -0.764236               | -3.236812 | 0.368873  |
| 22            | 8             | 0           | -2.962347               | -3.758404 | -0.559595 |
| 23            | 8             | 0           | -3.902245               | 1.567278  | 0.037317  |
| 24            | 6             | 0           | 1.399352                | -1.983884 | 1.486411  |
| 25            | 1             | 0           | 1.50962                 | -2.977659 | 1.050975  |
| 26            | 8             | 0           | 2.460958                | -1.145025 | 0.945515  |
| 27            | 6             | 0           | 3.643613                | -1.749336 | 0.672632  |
| 28            | 8             | 0           | 3.853926                | -2.922603 | 0.884836  |
| 29            | 6             | 0           | 4.63432                 | -0.810972 | 0.089485  |
| 30            | 6             | 0           | 4.341064                | 0.532577  | -0.191291 |



|                                              |   |   |           |              |           |
|----------------------------------------------|---|---|-----------|--------------|-----------|
| 31                                           | 6 | 0 | 5.911062  | -1.297693    | -0.197225 |
| 32                                           | 6 | 0 | 5.302721  | 1.360326     | -0.740609 |
| 33                                           | 1 | 0 | 3.352613  | 0.917974     | 0.01974   |
| 34                                           | 6 | 0 | 6.886721  | -0.475039    | -0.748288 |
| 35                                           | 1 | 0 | 6.128336  | -2.336499    | 0.018452  |
| 36                                           | 6 | 0 | 6.584304  | 0.864261     | -1.022889 |
| 37                                           | 1 | 0 | 5.093258  | 2.398789     | -0.965755 |
| 38                                           | 1 | 0 | 7.866824  | -0.88066     | -0.958726 |
| 39                                           | 8 | 0 | 7.454998  | 1.756799     | -1.558985 |
| 40                                           | 6 | 0 | 8.774133  | 1.32409      | -1.87184  |
| 41                                           | 1 | 0 | 8.76565   | 0.523936     | -2.619418 |
| 42                                           | 1 | 0 | 9.280893  | 2.195519     | -2.282246 |
| 43                                           | 1 | 0 | 9.305692  | 0.983437     | -0.97704  |
| 44                                           | 6 | 0 | 1.546029  | -2.075685    | 3.005115  |
| 45                                           | 1 | 0 | 2.49782   | -2.544109    | 3.260034  |
| 46                                           | 1 | 0 | 1.500846  | -1.082712    | 3.458924  |
| 47                                           | 1 | 0 | 0.737333  | -2.681367    | 3.421049  |
| 48                                           | 6 | 0 | -1.30803  | 5.451762     | 0.302219  |
| 49                                           | 1 | 0 | -1.163763 | 5.9001       | 1.288938  |
| 50                                           | 1 | 0 | -1.253113 | 6.241739     | -0.450901 |
| 51                                           | 1 | 0 | -0.49348  | 4.746771     | 0.123607  |
| 52                                           | 6 | 0 | -2.652271 | 4.741406     | 0.240213  |
| 53                                           | 1 | 0 | -2.767472 | 4.274067     | -0.747539 |
| 54                                           | 6 | 0 | -3.832355 | 5.681802     | 0.483473  |
| 55                                           | 1 | 0 | -3.866361 | 6.469219     | -0.274933 |
| 56                                           | 1 | 0 | -4.780759 | 5.137509     | 0.441785  |
| 57                                           | 1 | 0 | -3.748122 | 6.148286     | 1.46863   |
| 58                                           | 8 | 0 | -2.616187 | 3.709259     | 1.238871  |
| 59                                           | 1 | 0 | -3.436546 | 3.204998     | 1.18405   |
| -----                                        |   |   |           |              |           |
| Sum of electronic and zero-point Energies=   |   |   |           | -1495.740652 |           |
| Sum of electronic and thermal Free Energies= |   |   |           | -1495.812093 |           |

The transition state for ketyl formation in HAT process between IPA and para position of the compound **1** via the triplet surface:

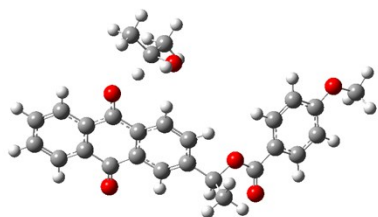

| Center Number | Atomic Number | Atomic Type | Coordinates (Angstroms) |           |           |
|---------------|---------------|-------------|-------------------------|-----------|-----------|
|               |               |             | X                       | Y         | Z         |
| 1             | 6             | 0           | -6.999308               | -0.408559 | -1.407265 |
| 2             | 6             | 0           | -5.99442                | 0.340342  | -0.830389 |
| 3             | 6             | 0           | -4.745688               | -0.251495 | -0.519979 |
| 4             | 6             | 0           | -4.542845               | -1.623609 | -0.819095 |
| 5             | 6             | 0           | -5.578552               | -2.358261 | -1.414291 |
| 6             | 6             | 0           | -6.795822               | -1.767825 | -1.702496 |
| 7             | 6             | 0           | -3.68245                | 0.522442  | 0.077911  |
| 8             | 6             | 0           | -3.257042               | -2.289757 | -0.546079 |
| 9             | 6             | 0           | -2.214125               | -1.462141 | 0.088267  |
| 10            | 6             | 0           | -2.430823               | -0.092498 | 0.409462  |
| 11            | 6             | 0           | -1.391031               | 0.606282  | 1.077011  |
| 12            | 1             | 0           | -1.529553               | 1.634042  | 1.380033  |
| 13            | 6             | 0           | -0.19899                | -0.015137 | 1.376824  |
| 14            | 6             | 0           | 0.029408                | -1.363983 | 1.030181  |
| 15            | 6             | 0           | -0.985055               | -2.061462 | 0.39682   |
| 16            | 1             | 0           | -7.950792               | 0.057575  | -1.638239 |
| 17            | 1             | 0           | -6.147435               | 1.389038  | -0.611273 |
| 18            | 1             | 0           | -5.38284                | -3.399793 | -1.638906 |
| 19            | 1             | 0           | -7.589062               | -2.348816 | -2.158644 |
| 20            | 1             | 0           | 0.577953                | 0.545079  | 1.8841    |
| 21            | 1             | 0           | -0.863545               | -3.102965 | 0.120584  |
| 22            | 8             | 0           | -3.066331               | -3.476218 | -0.823862 |
| 23            | 8             | 0           | -3.973469               | 1.789589  | 0.31475   |
| 24            | 6             | 0           | 1.328009                | -2.05012  | 1.38128   |
| 25            | 1             | 0           | 1.403231                | -2.996522 | 0.845245  |
| 26            | 8             | 0           | 2.407907                | -1.189228 | 0.908435  |
| 27            | 6             | 0           | 3.563328                | -1.794693 | 0.544265  |
| 28            | 8             | 0           | 3.742655                | -2.989676 | 0.622297  |
| 29            | 6             | 0           | 4.572219                | -0.827759 | 0.042047  |
| 30            | 6             | 0           | 4.321052                | 0.548211  | -0.071231 |

|    |   |   |           |           |           |
|----|---|---|-----------|-----------|-----------|
| 31 | 6 | 0 | 5.821781  | -1.319569 | -0.339418 |
| 32 | 6 | 0 | 5.296861  | 1.402443  | -0.551196 |
| 33 | 1 | 0 | 3.353628  | 0.937842  | 0.215798  |
| 34 | 6 | 0 | 6.811122  | -0.470885 | -0.822927 |
| 35 | 1 | 0 | 6.006685  | -2.38313  | -0.252774 |
| 36 | 6 | 0 | 6.550582  | 0.900413  | -0.930843 |
| 37 | 1 | 0 | 5.119734  | 2.466676  | -0.646511 |
| 38 | 1 | 0 | 7.769294  | -0.881352 | -1.110727 |
| 39 | 8 | 0 | 7.438379  | 1.820144  | -1.388644 |
| 40 | 6 | 0 | 8.72916   | 1.381577  | -1.796527 |
| 41 | 1 | 0 | 8.666143  | 0.673806  | -2.6298   |
| 42 | 1 | 0 | 9.255513  | 2.276661  | -2.122898 |
| 43 | 1 | 0 | 9.276139  | 0.921626  | -0.966669 |
| 44 | 6 | 0 | 1.500398  | -2.299372 | 2.879217  |
| 45 | 1 | 0 | 2.444182  | -2.813845 | 3.066925  |
| 46 | 1 | 0 | 1.489108  | -1.356968 | 3.432146  |
| 47 | 1 | 0 | 0.683787  | -2.924667 | 3.248008  |
| 48 | 6 | 0 | -1.450113 | 4.031443  | -0.679797 |
| 49 | 1 | 0 | -0.978465 | 5.018801  | -0.714387 |
| 50 | 1 | 0 | -2.007947 | 3.873594  | -1.604137 |
| 51 | 1 | 0 | -0.664428 | 3.277609  | -0.611274 |
| 52 | 6 | 0 | -2.374038 | 3.946935  | 0.51967   |
| 53 | 1 | 0 | -2.882662 | 2.894452  | 0.47961   |
| 54 | 6 | 0 | -3.543942 | 4.921715  | 0.519641  |
| 55 | 1 | 0 | -4.155442 | 4.78611   | -0.373582 |
| 56 | 1 | 0 | -4.187409 | 4.761878  | 1.389943  |
| 57 | 1 | 0 | -3.172511 | 5.951342  | 0.542354  |
| 58 | 8 | 0 | -1.597865 | 4.014108  | 1.687202  |
| 59 | 1 | 0 | -2.181574 | 4.124121  | 2.447259  |

-----

Sum of electronic and zero-point Energies= -1495.735254

Sum of electronic and thermal Free Energies= -1495.802598

The imaginary frequency: -112.50

The product complex for ketyl formation in HAT process between IPA and para position of the compound **1** via the triplet surface:

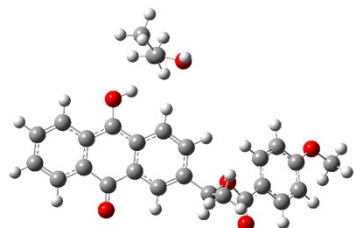

| Center Number | Atomic Number | Atomic Type | Coordinates (Angstroms) |           |           |
|---------------|---------------|-------------|-------------------------|-----------|-----------|
|               |               |             | X                       | Y         | Z         |
| 1             | 6             | 0           | -7.002012               | -0.543671 | -1.493838 |
| 2             | 6             | 0           | -5.990365               | 0.245872  | -0.985868 |
| 3             | 6             | 0           | -4.750855               | -0.328181 | -0.611837 |
| 4             | 6             | 0           | -4.570158               | -1.728724 | -0.771594 |
| 5             | 6             | 0           | -5.613222               | -2.507122 | -1.290107 |
| 6             | 6             | 0           | -6.818223               | -1.928457 | -1.648895 |
| 7             | 6             | 0           | -3.690286               | 0.472109  | -0.087154 |
| 8             | 6             | 0           | -3.299076               | -2.380265 | -0.403972 |
| 9             | 6             | 0           | -2.241512               | -1.503254 | 0.139113  |
| 10            | 6             | 0           | -2.442741               | -0.10184  | 0.298265  |
| 11            | 6             | 0           | -1.373907               | 0.663384  | 0.8335    |
| 12            | 1             | 0           | -1.470056               | 1.732618  | 0.982111  |
| 13            | 6             | 0           | -0.181123               | 0.070266  | 1.185759  |
| 14            | 6             | 0           | 0.019736                | -1.315875 | 1.020254  |
| 15            | 6             | 0           | -1.014896               | -2.075315 | 0.497107  |
| 16            | 1             | 0           | -7.945951               | -0.090447 | -1.775861 |
| 17            | 1             | 0           | -6.130359               | 1.31181   | -0.867402 |
| 18            | 1             | 0           | -5.438678               | -3.570515 | -1.398497 |
| 19            | 1             | 0           | -7.618565               | -2.540024 | -2.049358 |
| 20            | 1             | 0           | 0.619836                | 0.681742  | 1.584031  |
| 21            | 1             | 0           | -0.906069               | -3.143509 | 0.345771  |
| 22            | 8             | 0           | -3.125964               | -3.593098 | -0.539736 |
| 23            | 8             | 0           | -3.956637               | 1.792867  | 0.023159  |
| 24            | 6             | 0           | 1.314356                | -1.971    | 1.440241  |
| 25            | 1             | 0           | 1.396874                | -2.95692  | 0.981517  |
| 26            | 8             | 0           | 2.399824                | -1.149075 | 0.918156  |
| 27            | 6             | 0           | 3.567024                | -1.776477 | 0.635673  |
| 28            | 8             | 0           | 3.749651                | -2.958298 | 0.825061  |
| 29            | 6             | 0           | 4.581787                | -0.85079  | 0.072341  |
| 30            | 6             | 0           | 4.321117                | 0.504553  | -0.182138 |

|                                              |   |   |           |              |           |
|----------------------------------------------|---|---|-----------|--------------|-----------|
| 31                                           | 6 | 0 | 5.846976  | -1.361982    | -0.222421 |
| 32                                           | 6 | 0 | 5.303224  | 1.320165     | -0.713362 |
| 33                                           | 1 | 0 | 3.34131   | 0.908459     | 0.034424  |
| 34                                           | 6 | 0 | 6.843027  | -0.551841    | -0.755663 |
| 35                                           | 1 | 0 | 6.038897  | -2.409882    | -0.027635 |
| 36                                           | 6 | 0 | 6.573098  | 0.799456     | -1.003605 |
| 37                                           | 1 | 0 | 5.118771  | 2.367552     | -0.918227 |
| 38                                           | 1 | 0 | 7.813569  | -0.976294    | -0.97315  |
| 39                                           | 8 | 0 | 7.466071  | 1.681867     | -1.520329 |
| 40                                           | 6 | 0 | 8.774616  | 1.223787     | -1.840808 |
| 41                                           | 1 | 0 | 8.747911  | 0.439078     | -2.604181 |
| 42                                           | 1 | 0 | 9.302808  | 2.090696     | -2.233472 |
| 43                                           | 1 | 0 | 9.296936  | 0.852616     | -0.952687 |
| 44                                           | 6 | 0 | 1.461238  | -2.102105    | 2.956074  |
| 45                                           | 1 | 0 | 2.400902  | -2.600377    | 3.199377  |
| 46                                           | 1 | 0 | 1.441576  | -1.118557    | 3.432036  |
| 47                                           | 1 | 0 | 0.637398  | -2.696013    | 3.359016  |
| 48                                           | 6 | 0 | -1.861504 | 4.427841     | -0.827035 |
| 49                                           | 1 | 0 | -1.448029 | 5.428016     | -1.034111 |
| 50                                           | 1 | 0 | -2.708571 | 4.27091      | -1.49737  |
| 51                                           | 1 | 0 | -1.083714 | 3.699755     | -1.068939 |
| 52                                           | 6 | 0 | -2.28191  | 4.303952     | 0.600915  |
| 53                                           | 1 | 0 | -3.195076 | 2.31915      | 0.328635  |
| 54                                           | 6 | 0 | -3.475089 | 5.044926     | 1.119467  |
| 55                                           | 1 | 0 | -4.331382 | 4.919645     | 0.454419  |
| 56                                           | 1 | 0 | -3.77287  | 4.68848      | 2.112062  |
| 57                                           | 1 | 0 | -3.271311 | 6.125297     | 1.203871  |
| 58                                           | 8 | 0 | -1.199255 | 4.190692     | 1.450823  |
| 59                                           | 1 | 0 | -1.501601 | 4.250598     | 2.364075  |
| -----                                        |   |   |           |              |           |
| Sum of electronic and zero-point Energies=   |   |   |           | -1495.760680 |           |
| Sum of electronic and thermal Free Energies= |   |   |           | -1495.831021 |           |

The reaction complex for ketyl formation in HAT process between IPA and meta position of the compound **1** via the triplet surface:

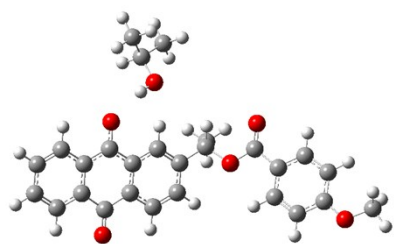

| Center Number | Atomic Number | Atomic Type | Coordinates (Angstroms) |           |           |
|---------------|---------------|-------------|-------------------------|-----------|-----------|
|               |               |             | X                       | Y         | Z         |
| 1             | 6             | 0           | 6.831957                | -2.612005 | -1.009634 |
| 2             | 6             | 0           | 5.663409                | -3.112189 | -0.464139 |
| 3             | 6             | 0           | 4.567188                | -2.273639 | -0.213152 |
| 4             | 6             | 0           | 4.667792                | -0.897797 | -0.524937 |
| 5             | 6             | 0           | 5.868706                | -0.395907 | -1.081633 |
| 6             | 6             | 0           | 6.93047                 | -1.243804 | -1.318247 |
| 7             | 6             | 0           | 3.34188                 | -2.852811 | 0.373322  |
| 8             | 6             | 0           | 3.546016                | -0.024684 | -0.270748 |
| 9             | 6             | 0           | 2.326522                | -0.535624 | 0.307034  |
| 10            | 6             | 0           | 2.232097                | -1.913014 | 0.617118  |
| 11            | 6             | 0           | 1.03757                 | -2.400204 | 1.169212  |
| 12            | 1             | 0           | 0.990364                | -3.459712 | 1.391288  |
| 13            | 6             | 0           | -0.028532               | -1.559257 | 1.419077  |
| 14            | 6             | 0           | 0.060794                | -0.184286 | 1.113624  |
| 15            | 6             | 0           | 1.224383                | 0.316155  | 0.559954  |
| 16            | 1             | 0           | 7.670386                | -3.272157 | -1.198404 |
| 17            | 1             | 0           | 5.553017                | -4.160106 | -0.211802 |
| 18            | 1             | 0           | 5.94268                 | 0.659375  | -1.315772 |
| 19            | 1             | 0           | 7.846247                | -0.849937 | -1.744561 |
| 20            | 1             | 0           | -0.944205               | -1.954036 | 1.841997  |
| 21            | 1             | 0           | 1.296588                | 1.367895  | 0.305962  |
| 22            | 8             | 0           | 3.663188                | 1.237685  | -0.569519 |
| 23            | 8             | 0           | 3.254427                | -4.051412 | 0.642679  |
| 24            | 6             | 0           | -1.082302               | 0.755865  | 1.426226  |
| 25            | 1             | 0           | -0.957075               | 1.689414  | 0.876432  |
| 26            | 8             | 0           | -2.300684               | 0.119224  | 0.947029  |
| 27            | 6             | 0           | -3.329552               | 0.936335  | 0.611732  |
| 28            | 8             | 0           | -3.282232               | 2.141263  | 0.720829  |
| 29            | 6             | 0           | -4.504182               | 0.184609  | 0.105062  |

|                                              |   |   |           |              |           |
|----------------------------------------------|---|---|-----------|--------------|-----------|
| 30                                           | 6 | 0 | -4.502044 | -1.207686    | -0.072652 |
| 31                                           | 6 | 0 | -5.657574 | 0.904404     | -0.212481 |
| 32                                           | 6 | 0 | -5.625756 | -1.855097    | -0.552129 |
| 33                                           | 1 | 0 | -3.610753 | -1.773817    | 0.162279  |
| 34                                           | 6 | 0 | -6.794369 | 0.264562     | -0.692621 |
| 35                                           | 1 | 0 | -5.64996  | 1.97881      | -0.07673  |
| 36                                           | 6 | 0 | -6.782398 | -1.124999    | -0.864459 |
| 37                                           | 1 | 0 | -5.640805 | -2.928148    | -0.697874 |
| 38                                           | 1 | 0 | -7.673621 | 0.848453     | -0.927545 |
| 39                                           | 8 | 0 | -7.830974 | -1.853692    | -1.324143 |
| 40                                           | 6 | 0 | -9.038829 | -1.180461    | -1.660481 |
| 41                                           | 1 | 0 | -8.883205 | -0.459915    | -2.470382 |
| 42                                           | 1 | 0 | -9.725287 | -1.955974    | -1.995124 |
| 43                                           | 1 | 0 | -9.466001 | -0.668106    | -0.791963 |
| 44                                           | 6 | 0 | -1.212172 | 1.055655     | 2.919902  |
| 45                                           | 1 | 0 | -2.03166  | 1.755187     | 3.089875  |
| 46                                           | 1 | 0 | -1.398232 | 0.137969     | 3.483054  |
| 47                                           | 1 | 0 | -0.287386 | 1.504453     | 3.290413  |
| 48                                           | 6 | 0 | 1.624707  | 5.26603      | 0.564047  |
| 49                                           | 1 | 0 | 0.812169  | 5.627449     | -0.0717   |
| 50                                           | 1 | 0 | 2.112791  | 6.12602      | 1.029294  |
| 51                                           | 1 | 0 | 1.191706  | 4.6468       | 1.352212  |
| 52                                           | 6 | 0 | 2.620582  | 4.463815     | -0.260218 |
| 53                                           | 1 | 0 | 3.41696   | 4.090317     | 0.398606  |
| 54                                           | 6 | 0 | 3.253368  | 5.280386     | -1.386951 |
| 55                                           | 1 | 0 | 3.801851  | 6.137119     | -0.985165 |
| 56                                           | 1 | 0 | 3.958535  | 4.672987     | -1.962698 |
| 57                                           | 1 | 0 | 2.481287  | 5.647485     | -2.068263 |
| 58                                           | 8 | 0 | 1.9007    | 3.341267     | -0.794965 |
| 59                                           | 1 | 0 | 2.519829  | 2.791388     | -1.289682 |
| -----                                        |   |   |           |              |           |
| Sum of electronic and zero-point Energies=   |   |   |           | -1495.740399 |           |
| Sum of electronic and thermal Free Energies= |   |   |           | -1495.810956 |           |

The transition state for ketyl formation in HAT process between IPA and meta position of the compound **1** via the triplet surface:

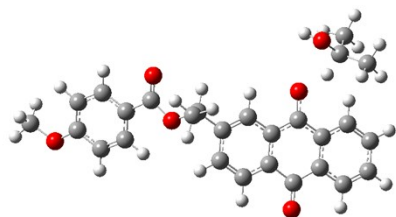

| Center Number | Atomic Number | Atomic Type | Coordinates (Angstroms) |           |           |
|---------------|---------------|-------------|-------------------------|-----------|-----------|
|               |               |             | X                       | Y         | Z         |
| 1             | 6             | 0           | 6.168974                | -2.796765 | -1.099344 |
| 2             | 6             | 0           | 5.028193                | -3.208812 | -0.434808 |
| 3             | 6             | 0           | 3.98817                 | -2.311561 | -0.154263 |
| 4             | 6             | 0           | 4.113947                | -0.94666  | -0.541304 |
| 5             | 6             | 0           | 5.277397                | -0.554592 | -1.248477 |
| 6             | 6             | 0           | 6.281786                | -1.460444 | -1.52017  |
| 7             | 6             | 0           | 2.771107                | -2.823924 | 0.504358  |
| 8             | 6             | 0           | 3.054967                | -0.023821 | -0.245592 |
| 9             | 6             | 0           | 1.835161                | -0.484563 | 0.367651  |
| 10            | 6             | 0           | 1.688506                | -1.849763 | 0.722478  |
| 11            | 6             | 0           | 0.494132                | -2.271635 | 1.325524  |
| 12            | 1             | 0           | 0.414884                | -3.318493 | 1.592783  |
| 13            | 6             | 0           | -0.534755               | -1.383888 | 1.571512  |
| 14            | 6             | 0           | -0.397827               | -0.020854 | 1.228137  |
| 15            | 6             | 0           | 0.771317                | 0.411909  | 0.63413   |
| 16            | 1             | 0           | 6.964586                | -3.502015 | -1.30945  |
| 17            | 1             | 0           | 4.893962                | -4.236098 | -0.118549 |
| 18            | 1             | 0           | 5.362828                | 0.46107   | -1.607869 |
| 19            | 1             | 0           | 7.158839                | -1.139789 | -2.071679 |
| 20            | 1             | 0           | -1.454166               | -1.730491 | 2.02801   |
| 21            | 1             | 0           | 0.891652                | 1.454717  | 0.367601  |
| 22            | 8             | 0           | 3.107798                | 1.261294  | -0.541152 |
| 23            | 8             | 0           | 2.663254                | -4.005276 | 0.842972  |
| 24            | 6             | 0           | -1.49423                | 0.97137   | 1.54289   |
| 25            | 1             | 0           | -1.303872               | 1.911686  | 1.024543  |
| 26            | 8             | 0           | -2.735506               | 0.422231  | 1.0119    |
| 27            | 6             | 0           | -3.680964               | 1.308168  | 0.616578  |
| 28            | 8             | 0           | -3.545656               | 2.508868  | 0.704825  |
| 29            | 6             | 0           | -4.887142               | 0.638222  | 0.070452  |
| 30            | 6             | 0           | -4.984452               | -0.753866 | -0.080524 |



|    |   |   |            |           |           |
|----|---|---|------------|-----------|-----------|
| 31 | 6 | 0 | -5.966271  | 1.436472  | -0.313276 |
| 32 | 6 | 0 | -6.13197   | -1.324261 | -0.599819 |
| 33 | 1 | 0 | -4.150964  | -1.380594 | 0.207011  |
| 34 | 6 | 0 | -7.126236  | 0.87454   | -0.833895 |
| 35 | 1 | 0 | -5.882462  | 2.509927  | -0.196826 |
| 36 | 6 | 0 | -7.213416  | -0.515336 | -0.97984  |
| 37 | 1 | 0 | -6.222797  | -2.396048 | -0.726065 |
| 38 | 1 | 0 | -7.946421  | 1.518539  | -1.119991 |
| 39 | 8 | 0 | -8.292781  | -1.171652 | -1.476446 |
| 40 | 6 | 0 | -9.426255  | -0.414962 | -1.885533 |
| 41 | 1 | 0 | -9.173544  | 0.277422  | -2.695506 |
| 42 | 1 | 0 | -10.151915 | -1.141842 | -2.245686 |
| 43 | 1 | 0 | -9.857597  | 0.143569  | -1.048036 |
| 44 | 6 | 0 | -1.658     | 1.240114  | 3.038089  |
| 45 | 1 | 0 | -2.442593  | 1.980807  | 3.200828  |
| 46 | 1 | 0 | -1.915386  | 0.321638  | 3.570564  |
| 47 | 1 | 0 | -0.722871  | 1.625921  | 3.451252  |
| 48 | 6 | 0 | 6.360848   | 2.76525   | 0.274911  |
| 49 | 1 | 0 | 6.961858   | 3.679389  | 0.322832  |
| 50 | 1 | 0 | 6.945543   | 1.987522  | -0.218078 |
| 51 | 1 | 0 | 6.140932   | 2.446221  | 1.294679  |
| 52 | 6 | 0 | 5.074305   | 3.038352  | -0.478338 |
| 53 | 1 | 0 | 4.454187   | 2.04157   | -0.529683 |
| 54 | 6 | 0 | 5.231594   | 3.488526  | -1.927441 |
| 55 | 1 | 0 | 5.813656   | 2.765422  | -2.502332 |
| 56 | 1 | 0 | 4.256748   | 3.594832  | -2.411392 |
| 57 | 1 | 0 | 5.74519    | 4.454727  | -1.959719 |
| 58 | 8 | 0 | 4.289853   | 3.907554  | 0.281738  |
| 59 | 1 | 0 | 3.490718   | 4.122949  | -0.21445  |

-----

Sum of electronic and zero-point Energies= -1495.733065

Sum of electronic and thermal Free Energies= -1495.800797

The imaginary frequency: -140.49

The product complex for ketyl formation in HAT process between IPA and meta position of the compound **1** via the triplet surface:

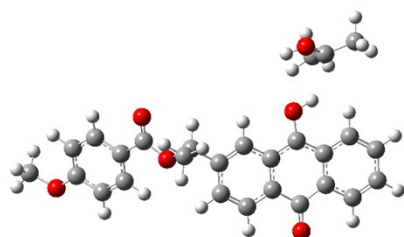

| Center Number | Atomic Number | Atomic Type | Coordinates (Angstroms) |           |           |
|---------------|---------------|-------------|-------------------------|-----------|-----------|
|               |               |             | X                       | Y         | Z         |
| 1             | 6             | 0           | 6.347219                | -2.446054 | -1.214925 |
| 2             | 6             | 0           | 5.137638                | -3.035538 | -0.888842 |
| 3             | 6             | 0           | 4.064719                | -2.269251 | -0.419    |
| 4             | 6             | 0           | 4.21436                 | -0.859521 | -0.269538 |
| 5             | 6             | 0           | 5.459579                | -0.277771 | -0.618512 |
| 6             | 6             | 0           | 6.502165                | -1.057058 | -1.077959 |
| 7             | 6             | 0           | 2.793421                | -2.948853 | -0.090986 |
| 8             | 6             | 0           | 3.115337                | -0.089677 | 0.216108  |
| 9             | 6             | 0           | 1.868824                | -0.693117 | 0.555626  |
| 10            | 6             | 0           | 1.6981                  | -2.09421  | 0.402694  |
| 11            | 6             | 0           | 0.466264                | -2.674709 | 0.732874  |
| 12            | 1             | 0           | 0.365164                | -3.745169 | 0.602383  |
| 13            | 6             | 0           | -0.577405               | -1.905286 | 1.210565  |
| 14            | 6             | 0           | -0.42108                | -0.511933 | 1.372405  |
| 15            | 6             | 0           | 0.784457                | 0.077344  | 1.041969  |
| 16            | 1             | 0           | 7.170468                | -3.051006 | -1.576386 |
| 17            | 1             | 0           | 4.981764                | -4.102933 | -0.986296 |
| 18            | 1             | 0           | 5.611285                | 0.794038  | -0.5356   |
| 19            | 1             | 0           | 7.446098                | -0.590162 | -1.335806 |
| 20            | 1             | 0           | -1.525576               | -2.368121 | 1.456293  |
| 21            | 1             | 0           | 0.914222                | 1.146099  | 1.155045  |
| 22            | 8             | 0           | 3.191543                | 1.25097   | 0.390453  |
| 23            | 8             | 0           | 2.659109                | -4.166344 | -0.223993 |
| 24            | 6             | 0           | -1.54084                | 0.331306  | 1.939394  |
| 25            | 1             | 0           | -1.328509               | 1.388621  | 1.777811  |
| 26            | 8             | 0           | -2.745994               | 0.006413  | 1.1878    |
| 27            | 6             | 0           | -3.673307               | 0.986238  | 1.058898  |
| 28            | 8             | 0           | -3.549719               | 2.08656   | 1.550264  |
| 29            | 6             | 0           | -4.841972               | 0.553823  | 0.253652  |

|    |   |   |           |           |           |
|----|---|---|-----------|-----------|-----------|
| 30 | 6 | 0 | -4.928012 | -0.709934 | -0.351182 |
| 31 | 6 | 0 | -5.896498 | 1.454088  | 0.090066  |
| 32 | 6 | 0 | -6.040679 | -1.057066 | -1.094993 |
| 33 | 1 | 0 | -4.113331 | -1.412286 | -0.236808 |
| 34 | 6 | 0 | -7.021058 | 1.115918  | -0.653598 |
| 35 | 1 | 0 | -5.821527 | 2.428406  | 0.556913  |
| 36 | 6 | 0 | -7.097822 | -0.147926 | -1.251432 |
| 37 | 1 | 0 | -6.122595 | -2.026859 | -1.570083 |
| 38 | 1 | 0 | -7.822406 | 1.833849  | -0.761175 |
| 39 | 8 | 0 | -8.144371 | -0.585417 | -1.99649  |
| 40 | 6 | 0 | -9.255216 | 0.281847  | -2.194817 |
| 41 | 1 | 0 | -8.960181 | 1.19591   | -2.720882 |
| 42 | 1 | 0 | -9.958972 | -0.276416 | -2.809378 |
| 43 | 1 | 0 | -9.73215  | 0.544121  | -1.244551 |
| 44 | 6 | 0 | -1.788795 | 0.085223  | 3.426968  |
| 45 | 1 | 0 | -2.586573 | 0.737582  | 3.785528  |
| 46 | 1 | 0 | -2.068432 | -0.955603 | 3.605531  |
| 47 | 1 | 0 | -0.881115 | 0.299617  | 3.996281  |
| 48 | 6 | 0 | 6.381958  | 3.923778  | -0.530528 |
| 49 | 1 | 0 | 6.545663  | 4.993329  | -0.740783 |
| 50 | 1 | 0 | 6.981499  | 3.352793  | -1.242739 |
| 51 | 1 | 0 | 6.753969  | 3.732479  | 0.478735  |
| 52 | 6 | 0 | 4.935941  | 3.567928  | -0.639558 |
| 53 | 1 | 0 | 4.079717  | 1.598692  | 0.208468  |
| 54 | 6 | 0 | 4.25385   | 3.531732  | -1.972876 |
| 55 | 1 | 0 | 4.847683  | 2.976413  | -2.701772 |
| 56 | 1 | 0 | 3.270622  | 3.053773  | -1.909772 |
| 57 | 1 | 0 | 4.10201   | 4.548701  | -2.371389 |
| 58 | 8 | 0 | 4.206119  | 4.063506  | 0.421815  |
| 59 | 1 | 0 | 3.270819  | 3.870716  | 0.286799  |

---

Sum of electronic and zero-point Energies= -1495.759991  
Sum of electronic and thermal Free Energies= -1495.830266

The reaction complex for ketyl formation in HAT process between MeOH and para position of the compound **1** via the triplet surface:

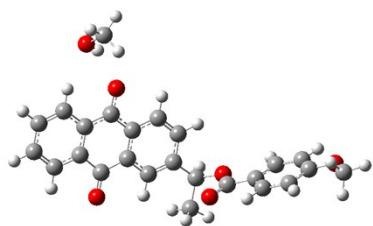

| Center Number | Atomic Number | Atomic Type | Coordinates (Angstroms) |           |           |
|---------------|---------------|-------------|-------------------------|-----------|-----------|
|               |               |             | X                       | Y         | Z         |
| 1             | 6             | 0           | 0.087752                | -0.128998 | -1.71644  |
| 2             | 6             | 0           | -1.048048               | 0.602729  | -1.458837 |
| 3             | 6             | 0           | -2.107371               | 0.035197  | -0.709788 |
| 4             | 6             | 0           | -1.974762               | -1.285391 | -0.227908 |
| 5             | 6             | 0           | -0.799963               | -2.002547 | -0.499457 |
| 6             | 6             | 0           | 0.234085                | -1.4501   | -1.235513 |
| 7             | 6             | 0           | -3.308644               | 0.782414  | -0.433499 |
| 8             | 6             | 0           | -3.040826               | -1.938182 | 0.556701  |
| 9             | 6             | 0           | -4.251176               | -1.130587 | 0.807194  |
| 10            | 6             | 0           | -4.387108               | 0.19444   | 0.326274  |
| 11            | 6             | 0           | -5.572243               | 0.919735  | 0.597371  |
| 12            | 1             | 0           | -5.677939               | 1.931879  | 0.224847  |
| 13            | 6             | 0           | -6.587239               | 0.329935  | 1.323388  |
| 14            | 6             | 0           | -6.456539               | -0.985093 | 1.801712  |
| 15            | 6             | 0           | -5.301621               | -1.700206 | 1.541921  |
| 16            | 1             | 0           | 0.891473                | 0.317151  | -2.291727 |
| 17            | 1             | 0           | -1.145926               | 1.615584  | -1.831413 |
| 18            | 1             | 0           | -0.744739               | -3.00611  | -0.098329 |
| 19            | 1             | 0           | -7.49332                | 0.890978  | 1.523051  |
| 20            | 1             | 0           | -7.259233               | -1.437761 | 2.372254  |
| 21            | 1             | 0           | -5.166441               | -2.716279 | 1.893014  |
| 22            | 8             | 0           | -2.929681               | -3.092228 | 0.972224  |
| 23            | 8             | 0           | -3.391642               | 2.009349  | -0.861559 |
| 24            | 6             | 0           | 1.494252                | -2.217662 | -1.598121 |
| 25            | 6             | 0           | 1.6129                  | -3.63715  | -1.056288 |
| 26            | 8             | 0           | 2.690903                | -1.426354 | -1.309628 |
| 27            | 1             | 0           | 0.821979                | -4.262165 | -1.47801  |
| 28            | 1             | 0           | 2.572766                | -4.0572   | -1.363766 |
| 29            | 1             | 0           | 1.548899                | -3.664087 | 0.029941  |
| 30            | 6             | 0           | 2.978376                | -1.115627 | -0.019731 |

|    |   |   |           |           |           |
|----|---|---|-----------|-----------|-----------|
| 31 | 8 | 0 | 2.300918  | -1.460136 | 0.920357  |
| 32 | 6 | 0 | 4.218989  | -0.306361 | 0.091954  |
| 33 | 6 | 0 | 4.995139  | 0.063105  | -1.017784 |
| 34 | 6 | 0 | 4.625519  | 0.098486  | 1.364796  |
| 35 | 6 | 0 | 6.142366  | 0.817025  | -0.851976 |
| 36 | 1 | 0 | 4.691026  | -0.249415 | -2.007797 |
| 37 | 6 | 0 | 5.776387  | 0.857156  | 1.544246  |
| 38 | 1 | 0 | 4.022408  | -0.191972 | 2.216177  |
| 39 | 6 | 0 | 6.542847  | 1.221137  | 0.430456  |
| 40 | 1 | 0 | 6.753634  | 1.109833  | -1.696749 |
| 41 | 1 | 0 | 6.065424  | 1.156419  | 2.542325  |
| 42 | 1 | 0 | 1.541614  | -2.266109 | -2.689833 |
| 43 | 8 | 0 | 7.681572  | 1.957617  | 0.485433  |
| 44 | 6 | 0 | 8.151733  | 2.399683  | 1.753982  |
| 45 | 1 | 0 | 8.383741  | 1.554915  | 2.411077  |
| 46 | 1 | 0 | 9.062784  | 2.959844  | 1.551862  |
| 47 | 1 | 0 | 7.424103  | 3.055257  | 2.243951  |
| 48 | 6 | 0 | -4.678613 | 5.022467  | -0.439945 |
| 49 | 1 | 0 | -3.809188 | 4.70766   | 0.148159  |
| 50 | 1 | 0 | -5.382972 | 5.529378  | 0.220098  |
| 51 | 1 | 0 | -4.34849  | 5.7332    | -1.207909 |
| 52 | 8 | 0 | -5.364225 | 3.913136  | -1.010577 |
| 53 | 1 | 0 | -4.731526 | 3.404289  | -1.529456 |

---

Sum of electronic and zero-point Energies= -1417.131225

Sum of electronic and thermal Free Energies= -1417.197699

The transition state for ketyl formation in HAT process between MeOH and para position of the compound **1** via the triplet surface:

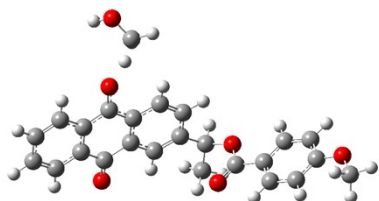

| Center Number | Atomic Number | Atomic Type | Coordinates (Angstroms) |           |           |
|---------------|---------------|-------------|-------------------------|-----------|-----------|
|               |               |             | X                       | Y         | Z         |
| 1             | 6             | 0           | 0.056794                | 0.683874  | 1.26723   |
| 2             | 6             | 0           | 1.141263                | 1.25592   | 0.642922  |
| 3             | 6             | 0           | 2.254226                | 0.470681  | 0.245968  |
| 4             | 6             | 0           | 2.189909                | -0.932568 | 0.473222  |
| 5             | 6             | 0           | 1.07129                 | -1.486181 | 1.110807  |
| 6             | 6             | 0           | 0.006672                | -0.704328 | 1.526348  |
| 7             | 6             | 0           | 3.398141                | 1.034549  | -0.404793 |
| 8             | 6             | 0           | 3.253944                | -1.841269 | 0.005578  |
| 9             | 6             | 0           | 4.355877                | -1.222121 | -0.754176 |
| 10            | 6             | 0           | 4.425111                | 0.184012  | -0.946031 |
| 11            | 6             | 0           | 5.526226                | 0.726849  | -1.653529 |
| 12            | 1             | 0           | 5.583516                | 1.799068  | -1.789903 |
| 13            | 6             | 0           | 6.507179                | -0.100167 | -2.160235 |
| 14            | 6             | 0           | 6.435768                | -1.491456 | -1.969011 |
| 15            | 6             | 0           | 5.375342                | -2.03643  | -1.266177 |
| 16            | 1             | 0           | -0.788638               | 1.304388  | 1.54307   |
| 17            | 1             | 0           | 1.123045                | 2.311569  | 0.408614  |
| 18            | 1             | 0           | 1.076256                | -2.559725 | 1.245271  |
| 19            | 1             | 0           | 7.341223                | 0.327343  | -2.705669 |
| 20            | 1             | 0           | 7.212659                | -2.133922 | -2.367243 |
| 21            | 1             | 0           | 5.298316                | -3.102162 | -1.088109 |
| 22            | 8             | 0           | 3.217118                | -3.054415 | 0.225743  |
| 23            | 8             | 0           | 3.555686                | 2.338884  | -0.59548  |
| 24            | 6             | 0           | -1.190371               | -1.265683 | 2.274713  |
| 25            | 6             | 0           | -1.235469               | -2.77832  | 2.454925  |
| 26            | 8             | 0           | -2.444465               | -0.747676 | 1.724564  |
| 27            | 1             | 0           | -0.398597               | -3.102    | 3.078454  |
| 28            | 1             | 0           | -2.160926               | -3.050127 | 2.96693   |
| 29            | 1             | 0           | -1.193267               | -3.300412 | 1.500949  |
| 30            | 6             | 0           | -2.795754               | -1.083831 | 0.457294  |
| 31            | 8             | 0           | -2.137665               | -1.806918 | -0.253212 |

|    |   |   |           |           |           |
|----|---|---|-----------|-----------|-----------|
| 32 | 6 | 0 | -4.080091 | -0.454927 | 0.053441  |
| 33 | 6 | 0 | -4.836014 | 0.361746  | 0.908827  |
| 34 | 6 | 0 | -4.549092 | -0.694035 | -1.239598 |
| 35 | 6 | 0 | -6.024292 | 0.921422  | 0.476083  |
| 36 | 1 | 0 | -4.483654 | 0.549544  | 1.914265  |
| 37 | 6 | 0 | -5.741455 | -0.136359 | -1.686598 |
| 38 | 1 | 0 | -3.960832 | -1.32621  | -1.893251 |
| 39 | 6 | 0 | -6.48701  | 0.678058  | -0.825759 |
| 40 | 1 | 0 | -6.620444 | 1.553123  | 1.123124  |
| 41 | 1 | 0 | -6.077938 | -0.339059 | -2.694059 |
| 42 | 1 | 0 | -1.201384 | -0.80517  | 3.267155  |
| 43 | 8 | 0 | -7.661815 | 1.274408  | -1.153168 |
| 44 | 6 | 0 | -8.192354 | 1.072643  | -2.458199 |
| 45 | 1 | 0 | -8.407066 | 0.014887  | -2.643625 |
| 46 | 1 | 0 | -9.120883 | 1.639666  | -2.490064 |
| 47 | 1 | 0 | -7.511303 | 1.448272  | -3.229181 |
| 48 | 6 | 0 | 2.970368  | 3.942212  | 1.406151  |
| 49 | 1 | 0 | 3.069155  | 3.207804  | 0.476928  |
| 50 | 1 | 0 | 2.032724  | 4.484066  | 1.285058  |
| 51 | 1 | 0 | 2.963702  | 3.279304  | 2.27861   |
| 52 | 8 | 0 | 4.017859  | 4.843398  | 1.371195  |
| 53 | 1 | 0 | 4.833349  | 4.392559  | 1.619108  |

---

Sum of electronic and zero-point Energies= -1417.120458

Sum of electronic and thermal Free Energies= -1417.184344

The imaginary frequency: -380.89

The product complex for ketyl formation in HAT process between MeOH and para position of the compound **1** via the triplet surface:

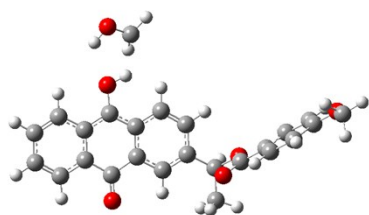

| Center Number | Atomic Number | Atomic Type | Coordinates (Angstroms) |           |           |
|---------------|---------------|-------------|-------------------------|-----------|-----------|
|               |               |             | X                       | Y         | Z         |
| 1             | 6             | 0           | 0.06129                 | 0.392437  | 1.41741   |
| 2             | 6             | 0           | 1.148044                | 1.063158  | 0.903094  |
| 3             | 6             | 0           | 2.244085                | 0.3558    | 0.345089  |
| 4             | 6             | 0           | 2.188574                | -1.066134 | 0.352925  |
| 5             | 6             | 0           | 1.066178                | -1.719667 | 0.873476  |
| 6             | 6             | 0           | -0.004317               | -1.017374 | 1.404489  |
| 7             | 6             | 0           | 3.3842                  | 1.005171  | -0.206989 |
| 8             | 6             | 0           | 3.302377                | -1.881565 | -0.176554 |
| 9             | 6             | 0           | 4.45715                 | -1.145161 | -0.728993 |
| 10            | 6             | 0           | 4.482947                | 0.276329  | -0.747019 |
| 11            | 6             | 0           | 5.60638                 | 0.931797  | -1.307269 |
| 12            | 1             | 0           | 5.624763                | 2.012995  | -1.337886 |
| 13            | 6             | 0           | 6.66014                 | 0.200041  | -1.816786 |
| 14            | 6             | 0           | 6.632999                | -1.204462 | -1.7896   |
| 15            | 6             | 0           | 5.539379                | -1.862614 | -1.252536 |
| 16            | 1             | 0           | -0.764536               | 0.957422  | 1.8348    |
| 17            | 1             | 0           | 1.150349                | 2.148088  | 0.953381  |
| 18            | 1             | 0           | 1.075128                | -2.800777 | 0.837494  |
| 19            | 1             | 0           | 7.513593                | 0.714639  | -2.243912 |
| 20            | 1             | 0           | 7.465061                | -1.770188 | -2.192494 |
| 21            | 1             | 0           | 5.485433                | -2.943906 | -1.223213 |
| 22            | 8             | 0           | 3.269163                | -3.112419 | -0.153653 |
| 23            | 8             | 0           | 3.484275                | 2.361443  | -0.252791 |
| 24            | 6             | 0           | -1.209913               | -1.696271 | 2.032681  |
| 25            | 6             | 0           | -1.265427               | -3.216392 | 1.935581  |
| 26            | 8             | 0           | -2.455123               | -1.077943 | 1.577255  |
| 27            | 1             | 0           | -0.435367               | -3.654844 | 2.494754  |
| 28            | 1             | 0           | -2.19597                | -3.569156 | 2.385036  |
| 29            | 1             | 0           | -1.220787               | -3.557206 | 0.902975  |



|    |   |   |           |           |           |
|----|---|---|-----------|-----------|-----------|
| 30 | 6 | 0 | -2.798646 | -1.179925 | 0.267387  |
| 31 | 8 | 0 | -2.133213 | -1.762084 | -0.556876 |
| 32 | 6 | 0 | -4.082137 | -0.491359 | -0.023843 |
| 33 | 6 | 0 | -4.841548 | 0.160645  | 0.960287  |
| 34 | 6 | 0 | -4.547991 | -0.500351 | -1.340006 |
| 35 | 6 | 0 | -6.030401 | 0.785121  | 0.630402  |
| 36 | 1 | 0 | -4.491607 | 0.16863   | 1.983866  |
| 37 | 6 | 0 | -5.741267 | 0.124174  | -1.684114 |
| 38 | 1 | 0 | -3.9574   | -1.006426 | -2.093695 |
| 39 | 6 | 0 | -6.490515 | 0.772855  | -0.694933 |
| 40 | 1 | 0 | -6.629353 | 1.291603  | 1.37721   |
| 41 | 1 | 0 | -6.075637 | 0.100909  | -2.712201 |
| 42 | 1 | 0 | -1.223254 | -1.422484 | 3.091784  |
| 43 | 8 | 0 | -7.666439 | 1.413753  | -0.914955 |
| 44 | 6 | 0 | -8.195598 | 1.440409  | -2.236001 |
| 45 | 1 | 0 | -8.40385  | 0.430153  | -2.60365  |
| 46 | 1 | 0 | -9.127367 | 1.998935  | -2.16919  |
| 47 | 1 | 0 | -7.51656  | 1.949142  | -2.928315 |
| 48 | 6 | 0 | 2.776927  | 4.547542  | 1.805031  |
| 49 | 1 | 0 | 2.659583  | 2.782197  | 0.027526  |
| 50 | 1 | 0 | 2.098801  | 5.325618  | 2.12796   |
| 51 | 1 | 0 | 3.047703  | 3.74396   | 2.483797  |
| 52 | 8 | 0 | 3.698864  | 4.97859   | 0.900111  |
| 53 | 1 | 0 | 4.283586  | 4.244758  | 0.671972  |

---

Sum of electronic and zero-point Energies= -1417.144145

Sum of electronic and thermal Free Energies= -1417.210123
